# Supplementary material for: Transcriptome Analysis of Chemically-Induced Sensory Neuron Ablation in Zebrafish
Source: PLoS One. 2016 Feb 10;11(2):e0148726. doi: 10.1371/journal.pone.0148726 (PMC4749159; doi:10.1371/journal.pone.0148726)
Supplement: S3 Table — (XLSX) [file pone.0148726.s004.xlsx]

## Sheet: group_treatment-5hr_FDR_Signifi
ensembl_gene_id	entrezgene	external_gene_name	gene_biotype	external_gene_source	description	logFC	logCPM	LR	PValue	FDR	control_3	control_2	control_1	met_5_2	met_5_3	met_5_1	met_2_3	met_2_1	met_2_2
ENSDARG00000095476	NA	si:ch211-277g23.4	processed_transcript	ZFIN	si:ch211-277g23.4 [Source:ZFIN;Acc:ZDB-GENE-070912-271]	3.65999	-1.91309	15.237	9.4809e-05	0.014475	0.46888	0.4571	0.4416	6.9385	5.798	7.5563	2.6371	1.7377	1.729
ENSDARG00000097533	NA	si:dkey-29l4.4	lincRNA	ZFIN	si:dkey-29l4.4 [Source:ZFIN;Acc:ZDB-GENE-131122-41]	3.25823	-1.81101	15.765	7.171e-05	0.011722	0.68577	0.66854	0.64587	7.1475	5.9726	7.7839	3.9529	2.6047	2.5918
ENSDARG00000080973	NA	U3	snoRNA	RFAM	Small nucleolar RNA U3 [Source:RFAM;Acc:RF00012]	2.82427	-1.64662	16.584	4.6553e-05	0.0084906	1.02893	1.00308	0.96907	7.5142	6.2791	8.1833	6.0493	3.9861	3.9663
ENSDARG00000070672	565510	slc2a9l1	protein_coding	ZFIN	solute carrier family 2 (facilitated glucose transporter), member 9-like 1 [Source:ZFIN;Acc:ZDB-GENE-090915-3]	2.77719	1.2129	58.814	1.7333e-14	6.5167e-11	11.0137	10.7369	10.3729	70.786	59.151	77.089	65.3498	43.062	42.847
ENSDARG00000039665	101882022	CABZ01055869.1	protein_coding	Clone-based (Ensembl)	Uncharacterized protein [Source:UniProtKB/TrEMBL;Acc:E7F8C1]	2.46025	0.927038	28.532	9.2171e-08	5.8983e-05	13.4129	13.0759	12.6325	69.054	57.704	75.203	36.3899	23.979	23.859
ENSDARG00000034207	100334961	si:dkey-91f15.8	protein_coding	ZFIN	si:dkey-91f15.8 [Source:ZFIN;Acc:ZDB-GENE-120214-21]	2.36785	0.442043	26.66	2.4264e-07	0.00012803	8.24964	8.04234	7.76965	40.03	33.45	43.594	35.8265	23.608	23.49
ENSDARG00000094990	100034658	si:dkey-91f15.1	protein_coding	ZFIN	si:dkey-91f15.1 [Source:ZFIN;Acc:ZDB-GENE-060601-4]	2.03625	2.02306	48.806	2.8252e-12	7.0812e-09	35.1058	34.2236	33.0632	134.01	111.98	145.94	82.9913	54.686	54.414
ENSDARG00000015355	564241	fosl1a	protein_coding	ZFIN	FOS-like antigen 1a [Source:ZFIN;Acc:ZDB-GENE-061207-7]	1.99903	2.55145	80.957	2.3063e-19	2.3123e-15	51.6735	50.375	48.667	192.05	160.48	209.15	139.381	91.843	91.386
ENSDARG00000096020	NA	si:ch211-120c15.3	protein_coding	ZFIN	si:ch211-120c15.3 [Source:ZFIN;Acc:ZDB-GENE-110913-99]	1.98911	-0.592132	16.599	4.6171e-05	0.0084906	5.13849	5.00937	4.83952	19.296	16.124	21.014	12.0125	7.9155	7.8761
ENSDARG00000035009	334253	trim35-27	protein_coding	ZFIN	tripartite motif containing 35-27 [Source:ZFIN;Acc:ZDB-GENE-030131-6185]	1.91738	1.74533	43.328	4.628e-11	7.7331e-08	25.0186	24.3899	23.5629	88.042	73.57	95.881	111.256	73.311	72.946
ENSDARG00000052917	553353	si:ch211-202f3.3	protein_coding	ZFIN	si:ch211-202f3.3 [Source:ZFIN;Acc:ZDB-GENE-080917-19]	1.87402	4.62232	194.721	2.9641e-44	8.9151e-40	231.309	225.496	217.85	787.14	657.75	857.22	593.43	391.03	389.09
ENSDARG00000091252	100001838	SLC22A7 (5 of 5)	protein_coding	HGNC Symbol	solute carrier family 22 (organic anion transporter), member 7 [Source:HGNC Symbol;Acc:HGNC:10971]	1.82634	0.998499	20.716	5.3268e-06	0.0015405	18.7438	18.2728	17.6532	61.999	51.808	67.52	46.0005	30.312	30.161
ENSDARG00000090478	NA	tnfrsf1a	protein_coding			1.75001	2.34072	21.162	4.2199e-06	0.0012821	49.1168	47.8825	46.259	153.6	128.35	167.28	137.112	90.348	89.898
ENSDARG00000070420	100004700	cyp24a1	protein_coding	ZFIN	cytochrome P450, family 24, subfamily A, polypeptide 1 [Source:ZFIN;Acc:ZDB-GENE-060825-1]	1.7332	5.37308	24.245	8.4838e-07	0.00034954	330.592	322.285	311.357	1020.2	852.54	1111.1	1382.65	911.08	906.55
ENSDARG00000089060	568823	kcnj1a.5	protein_coding	ZFIN	potassium inwardly-rectifying channel, subfamily J, member 1a, tandem duplicate 5 [Source:ZFIN;Acc:ZDB-GENE-050420-120]	1.6999	1.46403	44.886	2.0883e-11	4.1873e-08	22.9671	22.39	21.6308	69.52	58.093	75.71	88.1556	58.089	57.8
ENSDARG00000090635	569191	kcnj1a.4	protein_coding	ZFIN	potassium inwardly-rectifying channel, subfamily J, member 1a, tandem duplicate 4 [Source:ZFIN;Acc:ZDB-GENE-050420-186]	1.59865	0.520725	28.385	9.9448e-08	6.0551e-05	12.6892	12.3704	11.9509	35.913	30.01	39.111	41.4445	27.309	27.173
ENSDARG00000082187	NA	dre-mir-21-1	miRNA	miRBase	dre-mir-21-1 [Source:miRBase;Acc:MI0001908]	1.55274	0.382889	19.993	7.7714e-06	0.0021363	14.0743	13.7206	13.2554	38.556	32.219	41.989	26.0776	17.184	17.098
ENSDARG00000028396	368924	fkbp5	protein_coding	ZFIN	FK506 binding protein 5 [Source:ZFIN;Acc:ZDB-GENE-030616-630]	1.53291	7.36759	43.028	5.3956e-11	8.5412e-08	1406.03	1370.69	1324.22	3775.8	3155.2	4112	5275.06	3475.9	3458.6
ENSDARG00000087017	566996	PTGR1 (2 of 2)	protein_coding	HGNC Symbol	prostaglandin reductase 1 [Source:HGNC Symbol;Acc:HGNC:18429]	1.4922	3.57862	18.243	1.9444e-05	0.0043941	139.38	135.877	131.27	364.08	304.24	396.5	260.339	171.55	170.69
ENSDARG00000079938	553552	zgc:173594	protein_coding	ZFIN	zgc:173594 [Source:ZFIN;Acc:ZDB-GENE-071004-86]	1.44945	1.92159	37.255	1.0365e-09	1.0683e-06	45.2698	44.1323	42.6359	114.94	96.05	125.18	79.1181	52.134	51.874
ENSDARG00000055523	404609	slc22a6l	protein_coding	ZFIN	solute carrier family 22 (organic anion transporter), member 6, like [Source:ZFIN;Acc:ZDB-GENE-040426-2249]	1.44285	4.72651	93.07	5.0468e-22	7.5897e-18	280.573	273.523	264.249	708.04	591.66	771.08	782.314	515.5	512.93
ENSDARG00000093237	566247	si:ch211-89o9.4	protein_coding	ZFIN	si:ch211-89o9.4 [Source:ZFIN;Acc:ZDB-GENE-090313-134]	1.43828	2.03343	17.964	2.2511e-05	0.0049063	46.8349	45.658	44.1099	117.99	98.597	128.5	87.0786	57.38	57.094
ENSDARG00000012137	553543	cyp46a1	protein_coding	ZFIN	cytochrome P450, family 46, subfamily A, polypeptide 1 [Source:ZFIN;Acc:ZDB-GENE-050522-464]	1.4013	2.55513	29.208	6.5008e-08	4.5471e-05	79.2651	77.2733	74.6532	194.49	162.53	211.81	93.4112	61.552	61.246
ENSDARG00000059805	767662	slc25a38a	protein_coding	ZFIN	solute carrier family 25, member 38a [Source:ZFIN;Acc:ZDB-GENE-060929-320]	1.3723	1.61571	23.378	1.3308e-06	0.00050666	30.4523	29.6871	28.6805	73.354	61.297	79.885	101.284	66.74	66.407
ENSDARG00000007080	563826	rhcgl1	protein_coding	ZFIN	Rhesus blood group, C glycoprotein, like 1 [Source:ZFIN;Acc:ZDB-GENE-060209-2]	1.36106	3.31474	17.816	2.4336e-05	0.0050831	97.0341	94.5957	91.3884	231.5	193.45	252.11	351.525	231.63	230.48
ENSDARG00000088484	569052	kcnj1a.6	protein_coding	ZFIN	potassium inwardly-rectifying channel, subfamily J, member 1a, tandem duplicate 6 [Source:ZFIN;Acc:ZDB-GENE-050420-272]	1.329	1.78611	36.768	1.3305e-09	1.2909e-06	39.4826	38.4904	37.1853	92.235	77.074	100.45	91.5811	60.346	60.046
ENSDARG00000094386	100331278	gpr112b	protein_coding	ZFIN	G protein-coupled receptor 112b [Source:ZFIN;Acc:ZDB-GENE-091204-201]	1.32623	0.62372	12.865	0.00033476	0.035869	18.1958	17.7385	17.1371	42.526	35.536	46.313	33.8107	22.279	22.168
ENSDARG00000010146	445052	cpa2	protein_coding	ZFIN	carboxypeptidase A2 (pancreatic) [Source:ZFIN;Acc:ZDB-GENE-040801-182]	1.31332	1.25988	18.23	1.9577e-05	0.0043941	33.5558	32.7126	31.6034	77.569	64.818	84.475	28.7298	18.931	18.837
ENSDARG00000055974	436842	TPMT (2 of 2)	protein_coding	HGNC Symbol	thiopurine S-methyltransferase [Source:HGNC Symbol;Acc:HGNC:12014]	1.30712	3.10572	34.942	3.3966e-09	2.8378e-06	108.574	105.845	102.256	249.49	208.49	271.71	188.006	123.88	123.27
ENSDARG00000012395	387293	mmp13a	protein_coding	ZFIN	matrix metalloproteinase 13a [Source:ZFIN;Acc:ZDB-GENE-031202-2]	1.30302	1.91501	19.626	9.419e-06	0.0024213	49.351	48.1108	46.4796	113.18	94.579	123.26	87.3563	57.563	57.276
ENSDARG00000007371	563962	slc26a3	protein_coding	ZFIN	solute carrier family 26, member 3 [Source:ZFIN;Acc:ZDB-GENE-041210-180]	1.29377	1.55689	16.919	3.9001e-05	0.0075679	34.3957	33.5313	32.3944	78.433	65.541	85.417	77.8321	51.287	51.031
ENSDARG00000057121	570832	C7 (2 of 2)	protein_coding	HGNC Symbol	complement component 7 [Source:HGNC Symbol;Acc:HGNC:1346]	1.29217	3.15948	21.292	3.9435e-06	0.0012103	98.2249	95.7566	92.5098	223.4	186.68	243.3	299.984	197.67	196.69
ENSDARG00000094356	NA	pvrl4	protein_coding			1.2895	0.166696	13.518	0.00023627	0.028425	13.0064	12.6795	12.2496	29.682	24.803	32.325	24.3478	16.044	15.964
ENSDARG00000079333	793819	cd40lg	protein_coding	ZFIN	CD40 ligand [Source:ZFIN;Acc:ZDB-GENE-100727-1]	1.27953	0.144208	13.028	0.00030685	0.034285	13.0332	12.7057	12.2749	29.537	24.682	32.168	23.3854	15.41	15.333
ENSDARG00000086248	569137	kcnj1a.3	protein_coding	ZFIN	potassium inwardly-rectifying channel, subfamily J, member 1a, tandem duplicate 3 [Source:ZFIN;Acc:ZDB-GENE-050420-256]	1.27523	0.924376	20.381	6.346e-06	0.0018178	18.5148	18.0495	17.4375	41.761	34.897	45.48	62.7802	41.368	41.162
ENSDARG00000058734	541344	prdx1	protein_coding	ZFIN	peroxiredoxin 1 [Source:ZFIN;Acc:ZDB-GENE-050320-35]	1.27478	5.65415	63.564	1.5527e-15	7.7833e-12	638.144	622.108	601.014	1433	1197.5	1560.6	1236.4	814.71	810.65
ENSDARG00000016479	641479	ugt5a1	protein_coding	ZFIN	UDP glucuronosyltransferase 5 family, polypeptide A1 [Source:ZFIN;Acc:ZDB-GENE-051120-60]	1.24565	1.82023	20.056	7.5191e-06	0.002094	40.5179	39.4997	38.1604	89.328	74.645	97.282	103.251	68.037	67.698
ENSDARG00000058263	553749	zgc:113279	protein_coding	ZFIN	zgc:113279 [Source:ZFIN;Acc:ZDB-GENE-050522-529]	1.24138	4.17861	59.739	1.0828e-14	4.6527e-11	205.985	200.809	194	452.1	377.78	492.35	564.521	371.99	370.13
ENSDARG00000058498	568258	slc9a3.1	protein_coding	ZFIN	solute carrier family 9 (sodium/hydrogen exchanger), member 3, tandem duplicate 1 [Source:ZFIN;Acc:ZDB-GENE-060503-545]	1.23157	1.52777	15.539	8.0818e-05	0.012861	33.1647	32.3314	31.2351	72.436	60.53	78.886	83.2293	54.843	54.57
ENSDARG00000040284	100538016	si:dkey-79d12.5	protein_coding	ZFIN	si:dkey-79d12.5 [Source:ZFIN;Acc:ZDB-GENE-131127-429]	1.2166	3.31427	18.241	1.9469e-05	0.0043941	131.536	128.231	123.883	283.83	237.18	309.11	249.063	164.12	163.3
ENSDARG00000013522	378727	pck1	protein_coding	ZFIN	phosphoenolpyruvate carboxykinase 1 (soluble) [Source:ZFIN;Acc:ZDB-GENE-030909-11]	1.20179	9.0171	51.599	6.8064e-13	2.0472e-09	5840.23	5693.47	5500.43	12467	10417	13577	17472.6	11513	11456
ENSDARG00000097118	NA	si:dkey-33c14.3	lincRNA	ZFIN	si:dkey-33c14.3 [Source:ZFIN;Acc:ZDB-GENE-131121-627]	1.186	6.93834	40.729	1.749e-10	2.2962e-07	1469.9	1432.97	1384.38	3103.6	2593.5	3380	3312.07	2182.5	2171.6
ENSDARG00000076192	564159	ankrd1b	protein_coding	ZFIN	ankyrin repeat domain 1b (cardiac muscle) [Source:ZFIN;Acc:ZDB-GENE-070820-13]	1.18288	1.53962	22.827	1.7726e-06	0.00065821	36.4184	35.5033	34.2995	76.883	64.246	83.729	73.1991	48.234	47.994
ENSDARG00000058160	569366	tnfaip2b	protein_coding	ZFIN	tumor necrosis factor, alpha-induced protein 2b [Source:ZFIN;Acc:ZDB-GENE-081107-56]	1.18238	0.3595	14.323	0.00015396	0.020673	17.8481	17.3996	16.8096	37.747	31.542	41.108	20.6274	13.592	13.525
ENSDARG00000074093	NA	CU234171.2	protein_coding	Clone-based (Ensembl)	Uncharacterized protein [Source:UniProtKB/TrEMBL;Acc:F1RA16]	1.17766	1.54008	21.075	4.4161e-06	0.0013173	32.1878	31.3789	30.315	67.724	56.592	73.754	90.6077	59.705	59.408
ENSDARG00000087143	564060	serpina7	protein_coding	ZFIN	serpin peptidase inhibitor, clade A (alpha-1 antiproteinase, antitrypsin), member 7 [Source:ZFIN;Acc:ZDB-GENE-041010-47]	1.17431	3.42139	14.57	0.00013508	0.018665	138.473	134.994	130.417	290.16	242.47	316	276.083	181.92	181.02
ENSDARG00000011197	100002369	ugt2b3	protein_coding	ZFIN	UDP glucuronosyltransferase 2 family, polypeptide B3 [Source:ZFIN;Acc:ZDB-GENE-100402-2]	1.15365	2.11177	25.106	5.4254e-07	0.00024724	61.4844	59.9394	57.907	127.09	106.2	138.4	90.666	59.743	59.446
ENSDARG00000010940	NA	BX957278.1	protein_coding	UniProtKB Gene Name	Uncharacterized protein [Source:UniProtKB/TrEMBL;Acc:E7F2U0]	1.12942	2.12029	21.374	3.7793e-06	0.0011841	54.8295	53.4517	51.6394	111.46	93.138	121.38	118.46	78.058	77.669
ENSDARG00000088711	326706	lgals1l1	protein_coding	ZFIN	lectin, galactoside-binding, soluble, 1 (galectin 1)-like 1 [Source:ZFIN;Acc:ZDB-GENE-030131-4905]	1.11942	5.14611	16.83	4.0887e-05	0.0077833	507.797	495.036	478.251	1023.9	855.62	1115.1	742.089	488.99	486.56
ENSDARG00000060051	560024	slc47a2	protein_coding	ZFIN	solute carrier family 47, member 2 [Source:ZFIN;Acc:ZDB-GENE-070112-1472]	1.11209	3.41954	38.807	4.6789e-10	5.2122e-07	131.896	128.581	124.222	264.71	221.2	288.28	317.774	209.39	208.35
ENSDARG00000069630	561410	tat	protein_coding	ZFIN	tyrosine aminotransferase [Source:ZFIN;Acc:ZDB-GENE-030131-1144]	1.08654	6.07587	15.129	0.00010039	0.015099	671.432	654.56	632.366	1323.3	1105.8	1441.2	2855.69	1881.7	1872.4
ENSDARG00000045708	403114	adm2a	protein_coding	ZFIN	adrenomedullin 2a [Source:ZFIN;Acc:ZDB-GENE-041210-100]	1.08611	3.44083	17.493	2.8837e-05	0.0058211	142.21	138.636	133.936	280.31	234.23	305.27	313.713	206.72	205.69
ENSDARG00000010572	406541	slc25a25a	protein_coding	ZFIN	solute carrier family 25 (mitochondrial carrier; phosphate carrier), member 25a [Source:ZFIN;Acc:ZDB-GENE-040426-2396]	1.08159	5.48629	66.996	2.721e-16	2.046e-12	565.081	550.881	532.203	1109.9	927.49	1208.8	1345.77	886.78	882.36
ENSDARG00000078489	NA	78489	protein_coding			1.07387	3.54772	13.785	0.00020496	0.025686	147.379	143.676	138.804	288.04	240.69	313.68	328.785	216.65	215.57
ENSDARG00000039131	64614	atp1a1a.3	protein_coding	ZFIN	ATPase, Na+/K+ transporting, alpha 1a polypeptide, tandem duplicate 3 [Source:ZFIN;Acc:ZDB-GENE-001212-3]	1.06816	5.93449	54.884	1.2783e-13	4.2721e-10	822.904	802.226	775.025	1601.3	1338.1	1743.9	1643.75	1083.1	1077.7
ENSDARG00000061481	NA	61481	protein_coding			1.06125	4.21768	64.49	9.7046e-16	5.8377e-12	274.148	267.259	258.197	531.01	443.73	578.29	407.072	268.24	266.9
ENSDARG00000070948	641422	zgc:123284	protein_coding	ZFIN	zgc:123284 [Source:ZFIN;Acc:ZDB-GENE-051113-92]	1.05971	0.849028	12.407	0.00042784	0.044373	23.2182	22.6348	21.8673	45.047	37.642	49.058	44.9333	29.608	29.461
ENSDARG00000059054	393971	pdk2	protein_coding	ZFIN	pyruvate dehydrogenase kinase, isoenzyme 2 [Source:ZFIN;Acc:ZDB-GENE-040426-939]	1.04291	5.31882	17.88	2.3534e-05	0.0050201	478.173	466.157	450.351	914.39	764.09	995.81	1485.14	978.62	973.75
ENSDARG00000023526	393387	ggt1a	protein_coding	ZFIN	gamma-glutamyltransferase 1a [Source:ZFIN;Acc:ZDB-GENE-040426-1388]	1.04132	2.8662	21.072	4.4235e-06	0.0013173	85.7821	83.6265	80.791	163.97	137.01	178.56	245.548	161.8	161
ENSDARG00000023176	334082	tdo2b	protein_coding	ZFIN	tryptophan 2,3-dioxygenase b [Source:ZFIN;Acc:ZDB-GENE-030131-6014]	1.01555	4.9495	27.746	1.383e-07	7.703e-05	375.72	366.279	353.859	705	589.12	767.78	1131.95	745.89	742.17
ENSDARG00000057230	797436	CR376848.1	protein_coding	UniProtKB Gene Name	Uncharacterized protein [Source:UniProtKB/TrEMBL;Acc:E7EZ27]	1.0116	0.736529	12.149	0.0004912	0.04941	19.2204	18.7374	18.1021	36.085	30.154	39.299	50.9272	33.558	33.391
ENSDARG00000016465	NA	slc1a5	protein_coding	ZFIN	solute carrier family 1 (neutral amino acid transporter), member 5 [Source:ZFIN;Acc:ZDB-GENE-070501-4]	1.00649	1.11156	14.151	0.00016875	0.022164	26.0558	25.4011	24.5398	48.701	40.696	53.038	64.6186	42.58	42.368
ENSDARG00000062873	564849	slc2a11l	protein_coding	ZFIN	solute carrier family 2 (facilitated glucose transporter), member 11-like [Source:ZFIN;Acc:ZDB-GENE-061215-118]	0.99962	3.26995	22.779	1.8178e-06	0.00066485	137.414	133.961	129.419	255.09	213.16	277.8	252.267	166.23	165.4
ENSDARG00000009123	558139	sele	protein_coding	ZFIN	selectin E [Source:ZFIN;Acc:ZDB-GENE-041014-221]	0.99615	2.18542	24.556	7.2179e-07	0.00031013	68.2184	66.5042	64.2493	126.4	105.62	137.65	96.7632	63.761	63.444
ENSDARG00000061634	791218	zgc:158614	protein_coding	ZFIN	zgc:158614 [Source:ZFIN;Acc:ZDB-GENE-070112-2282]	0.98558	4.93342	35.697	2.3047e-09	2.1005e-06	434.248	423.336	408.982	798.06	666.88	869.12	789.91	520.5	517.91
ENSDARG00000002405	561694	2405	protein_coding			0.98367	4.396	44.216	2.9406e-11	5.5278e-08	314.069	306.177	295.795	576.46	481.71	627.79	480.237	316.45	314.87
ENSDARG00000058556	NA	muc5b	protein_coding	ZFIN	mucin 5b [Source:ZFIN;Acc:ZDB-GENE-121108-1]	0.96372	4.20623	23.623	1.1719e-06	0.00046376	278.993	271.982	262.76	505.06	422.04	550.03	453.403	298.77	297.28
ENSDARG00000016062	563108	16062	protein_coding			0.96306	3.89298	36.686	1.3878e-09	1.3044e-06	201.524	196.46	189.799	364.68	304.74	397.15	408.889	269.43	268.09
ENSDARG00000024365	436923	crlf1a	protein_coding	ZFIN	cytokine receptor-like factor 1a [Source:ZFIN;Acc:ZDB-GENE-040718-397]	0.96106	3.76318	29.045	7.071e-08	4.7261e-05	229.051	223.295	215.724	413.91	345.87	450.76	248.958	164.05	163.23
ENSDARG00000003615	563896	SLC26A3 (1 of 2)	protein_coding	HGNC Symbol	solute carrier family 26 (anion exchanger), member 3 [Source:HGNC Symbol;Acc:HGNC:3018]	0.9604	5.6307	28.399	9.8691e-08	6.0551e-05	710.18	692.334	668.86	1282.5	1071.7	1396.7	1188.61	783.22	779.32
ENSDARG00000029105	562700	ftr51	protein_coding	ZFIN	finTRIM family, member 51 [Source:ZFIN;Acc:ZDB-GENE-081104-54]	0.95884	2.50084	14.765	0.00012179	0.01736	77.6745	75.7226	73.1551	140.22	117.17	152.71	158.261	104.28	103.77
ENSDARG00000076773	100000656	lrrc58a	protein_coding	ZFIN	leucine rich repeat containing 58a [Source:ZFIN;Acc:ZDB-GENE-090312-76]	0.95289	3.62333	46.716	8.2052e-12	1.7628e-08	179.707	175.192	169.251	322.93	269.85	351.68	307.381	202.55	201.54
ENSDARG00000028012	573111	TPMT (1 of 2)	protein_coding	HGNC Symbol	thiopurine S-methyltransferase [Source:HGNC Symbol;Acc:HGNC:12014]	0.94521	2.30084	15.268	9.3304e-05	0.014375	69.5351	67.7878	65.4893	124.36	103.92	135.43	127.801	84.213	83.794
ENSDARG00000096990	NA	si:ch1073-340i21.2	protein_coding	ZFIN	si:ch1073-340i21.2 [Source:ZFIN;Acc:ZDB-GENE-131121-430]	0.94344	2.14949	13.442	0.00024601	0.029131	71.3357	69.5431	67.1852	127.42	106.48	138.77	84.7093	55.818	55.54
ENSDARG00000055644	541408	zgc:101788	protein_coding	ZFIN	zgc:101788 [Source:ZFIN;Acc:ZDB-GENE-050320-109]	0.93897	4.26079	20.918	4.7926e-06	0.0013995	255.211	248.798	240.362	454.16	379.51	494.59	540.996	356.48	354.71
ENSDARG00000088371	336038	junbb	protein_coding	ZFIN	jun B proto-oncogene b [Source:ZFIN;Acc:ZDB-GENE-040426-2666]	0.93373	5.4182	12.258	0.00046323	0.047389	783.265	763.583	737.692	1388.6	1160.3	1512.2	673.389	443.72	441.51
ENSDARG00000078619	791647	pnp5a	protein_coding	ZFIN	purine nucleoside phosphorylase 5a [Source:ZFIN;Acc:ZDB-GENE-040426-2553]	0.92471	7.28654	26.668	2.4162e-07	0.00012803	1979.78	1930.03	1864.59	3487.7	2914.4	3798.2	5618.41	3702.2	3683.8
ENSDARG00000077389	101886586	BX119910.6	protein_coding	Clone-based (Ensembl)	Uncharacterized protein [Source:UniProtKB/TrEMBL;Acc:F1QUY9]	0.92027	3.4308	12.23	0.00047017	0.047926	154.952	151.058	145.936	272.23	227.48	296.47	297.107	195.78	194.8
ENSDARG00000068194	565869	klf9	protein_coding	ZFIN	Kruppel-like factor 9 [Source:ZFIN;Acc:ZDB-GENE-060526-244]	0.915	5.8154	25.009	5.7051e-07	0.00025234	692.739	675.332	652.433	1212.2	1013	1320.2	2147.09	1414.8	1407.8
ENSDARG00000053476	393997	lipca	protein_coding	ZFIN	lipase, hepatic a [Source:ZFIN;Acc:ZDB-GENE-040426-1361]	0.91252	2.83317	15.909	6.6469e-05	0.01106	95.1171	92.7269	89.5829	166.26	138.93	181.06	219.637	144.73	144.01
ENSDARG00000013050	568482	abcc12	protein_coding	ZFIN	ATP-binding cassette, sub-family C (CFTR/MRP), member 12 [Source:ZFIN;Acc:ZDB-GENE-050517-25]	0.91184	5.03567	40.683	1.7903e-10	2.2962e-07	460.749	449.171	433.941	804.55	672.3	876.19	926.037	610.2	607.16
ENSDARG00000029075	386663	pfkfb4l	protein_coding	ZFIN	6-phosphofructo-2-kinase/fructose-2,6-biphosphatase 4, like [Source:ZFIN;Acc:ZDB-GENE-031031-4]	0.90531	6.72201	28.361	1.0066e-07	6.0551e-05	1218.58	1187.96	1147.68	2118.1	1769.9	2306.7	3967.5	2614.3	2601.3
ENSDARG00000022303	373084	hig1	protein_coding	ZFIN	hypoxia induced gene 1 [Source:ZFIN;Acc:ZDB-GENE-030826-15]	0.90469	4.66446	28.2	1.0943e-07	6.3332e-05	391.362	381.527	368.591	680.03	568.25	740.58	567.824	374.16	372.3
ENSDARG00000056638	436823	pir	protein_coding	ZFIN	pirin [Source:ZFIN;Acc:ZDB-GENE-040718-288]	0.90281	4.23549	28.759	8.1975e-08	5.3599e-05	286.425	279.228	269.76	497.07	415.37	541.33	446.653	294.32	292.85
ENSDARG00000036028	447866	arrdc3b	protein_coding	ZFIN	arrestin domain containing 3b [Source:ZFIN;Acc:ZDB-GENE-040912-182]	0.89957	6.50653	27.966	1.2345e-07	7.0058e-05	1252.07	1220.61	1179.22	2167.6	1811.3	2360.7	2749.38	1811.7	1802.7
ENSDARG00000014031	393561	abcc2	protein_coding	ZFIN	ATP-binding cassette, sub-family C (CFTR/MRP), member 2 [Source:ZFIN;Acc:ZDB-GENE-040426-1523]	0.89325	6.79423	50.804	1.0208e-12	2.7911e-09	1659.49	1617.79	1562.94	2860.4	2390.2	3115.1	2832.99	1866.8	1857.5
ENSDARG00000018621	553256	slc6a19a	protein_coding	ZFIN	solute carrier family 6 (neurotransmitter transporter), member 19a [Source:ZFIN;Acc:ZDB-GENE-070620-2]	0.88229	5.21628	40.638	1.8322e-10	2.2962e-07	544.154	530.48	512.493	930.9	777.89	1013.8	1045.47	688.9	685.47
ENSDARG00000053853	406537	slc13a2	protein_coding	ZFIN	solute carrier family 13 (sodium-dependent dicarboxylate transporter), member 2 [Source:ZFIN;Acc:ZDB-GENE-040426-2389]	0.8806	6.29353	12.997	0.00031206	0.034285	1178.32	1148.71	1109.76	2013.3	1682.4	2192.6	1878.02	1237.5	1231.3
ENSDARG00000014947	317638	igfbp1a	protein_coding	ZFIN	insulin-like growth factor binding protein 1a [Source:ZFIN;Acc:ZDB-GENE-021231-1]	0.86429	6.0799	13.473	0.00024203	0.028888	961.219	937.064	905.292	1623.9	1357	1768.5	2042.33	1345.8	1339.1
ENSDARG00000076221	100006523	zgc:198419	protein_coding	ZFIN	zgc:198419 [Source:ZFIN;Acc:ZDB-GENE-030131-7540]	0.86429	3.44648	17.632	2.68e-05	0.0055211	148.338	144.61	139.707	250.69	209.49	273.02	320.361	211.1	210.05
ENSDARG00000019236	553575	gsr	protein_coding	ZFIN	glutathione reductase [Source:ZFIN;Acc:ZDB-GENE-050522-116]	0.86359	5.27703	48.073	4.1061e-12	9.5e-09	596.776	581.78	562.054	1007.8	842.12	1097.5	950.916	626.6	623.48
ENSDARG00000063297	564067	abcb6a	protein_coding	ZFIN	ATP-binding cassette, sub-family B (MDR/TAP), member 6a [Source:ZFIN;Acc:ZDB-GENE-050517-9]	0.85127	3.74049	26.883	2.1611e-07	0.00011818	197.913	192.94	186.398	331.44	276.96	360.95	355.338	234.15	232.98
ENSDARG00000079544	100331270	si:ch1073-464p5.5	protein_coding	ZFIN	si:ch1073-464p5.5 [Source:ZFIN;Acc:ZDB-GENE-091116-35]	0.84895	6.13509	12.83	0.00034109	0.03638	1061.19	1034.52	999.445	1773.8	1482.3	1931.8	1924.13	1267.9	1261.6
ENSDARG00000069375	100037332	zgc:162608	protein_coding	ZFIN	zgc:162608 [Source:ZFIN;Acc:ZDB-GENE-070410-86]	0.84105	5.52219	21.562	3.4252e-06	0.0011077	638.376	622.334	601.233	1061.3	886.85	1155.8	1444.45	951.81	947.07
ENSDARG00000060246	561766	slc16a6b	protein_coding	ZFIN	solute carrier family 16 (monocarboxylic acid transporters), member 6b [Source:ZFIN;Acc:ZDB-GENE-110208-3]	0.83767	5.12252	39.677	2.9965e-10	3.605e-07	468.005	456.244	440.775	776.26	648.66	845.38	1154.26	760.59	756.8
ENSDARG00000042725	140814	cebpb	protein_coding	ZFIN	CCAAT/enhancer binding protein (C/EBP), beta [Source:ZFIN;Acc:ZDB-GENE-020111-3]	0.83234	4.93894	18.237	1.9506e-05	0.0043941	520.549	507.469	490.262	860.22	718.82	936.81	674.467	444.43	442.22
ENSDARG00000070453	100192219	gch1	protein_coding	ZFIN	GTP cyclohydrolase 1 [Source:ZFIN;Acc:ZDB-GENE-070720-5]	0.83182	5.70695	35.117	3.1055e-09	2.6687e-06	779.573	759.983	734.215	1287.7	1076.1	1402.4	1423.73	938.15	933.48
ENSDARG00000090903	100538072	CREB3L3 (2 of 2)	protein_coding	HGNC Symbol	cAMP responsive element binding protein 3-like 3 [Source:HGNC Symbol;Acc:HGNC:18855]	0.83085	3.59923	15.276	9.2882e-05	0.014375	183.085	178.484	172.432	302.3	252.61	329.22	313.895	206.84	205.81
ENSDARG00000005565	436652	entpd8	protein_coding	ZFIN	ectonucleoside triphosphate diphosphohydrolase 8 [Source:ZFIN;Acc:ZDB-GENE-040724-142]	0.83073	4.6769	12.985	0.00031408	0.034351	357.34	348.361	336.549	589.88	492.92	642.41	773.516	509.7	507.16
ENSDARG00000094702	NA	si:dkey-61n16.5	processed_transcript	ZFIN	si:dkey-61n16.5 [Source:ZFIN;Acc:ZDB-GENE-100922-235]	0.82713	2.45548	12.863	0.00033511	0.035869	84.0348	81.9231	79.1454	138.45	115.69	150.78	134.622	88.708	88.266
ENSDARG00000010231	405817	ppm1na	protein_coding	ZFIN	protein phosphatase, Mg2+/Mn2+ dependent, 1Na (putative) [Source:ZFIN;Acc:ZDB-GENE-040426-2731]	0.81708	5.14041	29.061	7.0146e-08	4.7261e-05	520.984	507.892	490.671	851.88	711.85	927.73	966.858	637.1	633.93
ENSDARG00000096505	NA	si:ch73-103l1.2	protein_coding	ZFIN	si:ch73-103l1.2 [Source:ZFIN;Acc:ZDB-GENE-121214-226]	0.81549	2.15818	13.398	0.00025183	0.029472	64.1998	62.5865	60.4644	104.94	87.692	114.29	123.551	81.413	81.007
ENSDARG00000016713	402945	dhrs13l1	protein_coding	ZFIN	dehydrogenase/reductase (SDR family) member 13 like 1 [Source:ZFIN;Acc:ZDB-GENE-040426-1907]	0.81439	4.06199	21.612	3.3372e-06	0.001091	269.828	263.047	254.128	440.43	368.03	479.64	377.378	248.67	247.43
ENSDARG00000077217	559822	zgc:162184	protein_coding	ZFIN	zgc:162184 [Source:ZFIN;Acc:ZDB-GENE-070424-83]	0.80161	4.42718	25.773	3.8405e-07	0.00019252	336.374	327.921	316.802	544.18	454.73	592.64	535.946	353.16	351.4
ENSDARG00000074561	101886448	SLC47A1 (4 of 7)	protein_coding	HGNC Symbol	solute carrier family 47 (multidrug and toxin extrusion), member 1 [Source:HGNC Symbol;Acc:HGNC:25588]	0.7948	2.62688	18.574	1.6341e-05	0.0039007	88.5654	86.3399	83.4124	142.67	119.22	155.38	176.774	116.48	115.9
ENSDARG00000091209	794081	ucp3	protein_coding	ZFIN	uncoupling protein 3 [Source:ZFIN;Acc:ZDB-GENE-040426-1317]	0.79375	3.57187	13.845	0.00019853	0.025195	155.047	151.151	146.026	249.52	208.5	271.74	442.499	291.58	290.13
ENSDARG00000040100	794350	si:dkey-95h12.1	protein_coding	ZFIN	si:dkey-95h12.1 [Source:ZFIN;Acc:ZDB-GENE-060503-85]	0.79327	4.01442	30.813	2.8407e-08	2.133e-05	292.546	285.195	275.525	470.56	393.21	512.46	274.056	180.59	179.69
ENSDARG00000018478	79378	agxtb	protein_coding	ZFIN	alanine-glyoxylate aminotransferase b [Source:ZFIN;Acc:ZDB-GENE-010302-3]	0.7893	8.2301	25.031	5.6427e-07	0.00025234	4083.21	3980.6	3845.63	6548.6	5472.2	7131.7	9768.99	6437.2	6405.1
ENSDARG00000077372	100333875	tfr1b	protein_coding	ZFIN	transferrin receptor 1b [Source:ZFIN;Acc:ZDB-GENE-041220-2]	0.78658	3.07845	18.099	2.0975e-05	0.0046732	144.872	141.231	136.443	231.99	193.86	252.65	162.563	107.12	106.59
ENSDARG00000016412	322485	agt	protein_coding	ZFIN	angiotensinogen [Source:ZFIN;Acc:ZDB-GENE-030131-1205]	0.78231	5.52709	14.006	0.00018221	0.02352	672.999	656.087	633.842	1074.2	897.64	1169.9	1410.13	929.19	924.56
ENSDARG00000007344	556258	tcap	protein_coding	ZFIN	titin-cap (telethonin) [Source:ZFIN;Acc:ZDB-GENE-070501-5]	0.77873	4.25849	22.761	1.8347e-06	0.00066485	303.709	296.077	286.038	483.61	404.12	526.68	478.903	315.57	314
ENSDARG00000042816	406397	mmp9	protein_coding	ZFIN	matrix metalloproteinase 9 [Source:ZFIN;Acc:ZDB-GENE-040426-2132]	0.77163	3.4667	24.639	6.9146e-07	0.00030141	158.578	154.593	149.351	251.31	210	273.69	328.629	216.55	215.47
ENSDARG00000005947	445158	slc16a9b	protein_coding	ZFIN	solute carrier family 16 (monocarboxylic acid transporters), member 9b [Source:ZFIN;Acc:ZDB-GENE-040801-69]	0.77005	4.35834	37.201	1.0656e-09	1.0683e-06	299.009	291.495	281.612	473.27	395.48	515.41	600.828	395.91	393.94
ENSDARG00000025122	550276	abhd4	protein_coding	ZFIN	abhydrolase domain containing 4 [Source:ZFIN;Acc:ZDB-GENE-050417-83]	0.76758	3.75112	25.657	4.0775e-07	0.00020105	212.888	207.539	200.502	336.41	281.11	366.36	342.557	225.72	224.6
ENSDARG00000036135	572649	bbox1	protein_coding	ZFIN	butyrobetaine (gamma), 2-oxoglutarate dioxygenase 1 (gamma-butyrobetaine hydroxylase) [Source:ZFIN;Acc:ZDB-GENE-050417-218]	0.7673	5.05352	40.755	1.7254e-10	2.2962e-07	487.022	474.784	458.685	769.34	642.88	837.84	968.934	638.47	635.29
ENSDARG00000038025	550551	cbx7a	protein_coding	ZFIN	chromobox homolog 7a [Source:ZFIN;Acc:ZDB-GENE-050417-400]	0.76349	5.79436	19.195	1.1802e-05	0.0028859	839.635	818.536	790.782	1322.8	1105.4	1440.6	1579.88	1041	1035.9
ENSDARG00000055705	327320	f5	protein_coding	ZFIN	coagulation factor V [Source:ZFIN;Acc:ZDB-GENE-030131-5531]	0.76145	6.57356	24.269	8.3795e-07	0.00034954	1482.96	1445.69	1396.67	2332.9	1949.5	2540.7	2596.85	1711.2	1702.6
ENSDARG00000031776	436651	zgc:92066	protein_coding	ZFIN	zgc:92066 [Source:ZFIN;Acc:ZDB-GENE-040718-72]	0.76051	6.52805	18.657	1.5651e-05	0.0037658	1491.72	1454.23	1404.92	2345.2	1959.7	2554	2210.81	1456.8	1449.5
ENSDARG00000006598	559050	sgk2b	protein_coding	ZFIN	serum/glucocorticoid regulated kinase 2b [Source:ZFIN;Acc:ZDB-GENE-060929-44]	0.75998	2.97931	22.689	1.9046e-06	0.00068195	118.182	115.212	111.306	185.81	155.27	202.35	217.818	143.53	142.81
ENSDARG00000005039	79381	gstp1	protein_coding	ZFIN	glutathione S-transferase pi 1 [Source:ZFIN;Acc:ZDB-GENE-020806-4]	0.75591	7.51527	19.81	8.5535e-06	0.0022567	2903.03	2830.08	2734.12	4549.4	3801.6	4954.4	4673.36	3079.5	3064.1
ENSDARG00000025522	324140	sgk1	protein_coding	ZFIN	serum/glucocorticoid regulated kinase 1 [Source:ZFIN;Acc:ZDB-GENE-030131-2860]	0.75224	6.16552	30.884	2.7392e-08	2.1125e-05	1078.24	1051.14	1015.5	1685.5	1408.4	1835.6	2089.02	1376.5	1369.7
ENSDARG00000061231	562116	tinagl1	protein_coding	ZFIN	tubulointerstitial nephritis antigen-like 1 [Source:ZFIN;Acc:ZDB-GENE-060503-240]	0.74453	6.52499	26.1	3.2425e-07	0.00016815	1618.2	1577.54	1524.05	2516	2102.4	2740	2030.09	1337.7	1331
ENSDARG00000009040	393762	si:ch73-141c7.1	protein_coding	ZFIN	si:ch73-141c7.1 [Source:ZFIN;Acc:ZDB-GENE-040426-1760]	0.74144	4.72159	20.982	4.637e-06	0.0013673	383.189	373.56	360.894	594.58	496.84	647.52	849.606	559.84	557.05
ENSDARG00000095767	NA	dio3b	processed_transcript	ZFIN	deiodinase, iodothyronine type IIIb [Source:ZFIN;Acc:ZDB-GENE-070705-53]	0.74118	5.18968	37.235	1.0473e-09	1.0683e-06	505.499	492.796	476.087	784.19	655.29	854.02	1182.65	779.3	775.42
ENSDARG00000088655	100537515	CABZ01007794.1	protein_coding	Clone-based (Ensembl)	Uncharacterized protein [Source:UniProtKB/TrEMBL;Acc:E7FDK0]	0.74089	4.05928	15.062	0.00010406	0.015343	230.031	224.251	216.647	356.83	298.17	388.6	534.367	352.12	350.36
ENSDARG00000004539	246227	ptgs2a	protein_coding	ZFIN	prostaglandin-endoperoxide synthase 2a [Source:ZFIN;Acc:ZDB-GENE-020530-2]	0.73437	4.05742	14.522	0.00013854	0.019027	288.982	281.72	272.168	446.23	372.88	485.96	375.625	247.51	246.28
ENSDARG00000043581	393548	gadd45aa	protein_coding	ZFIN	growth arrest and DNA-damage-inducible, alpha, a [Source:ZFIN;Acc:ZDB-GENE-040426-1501]	0.73041	2.76051	17.434	2.9749e-05	0.005965	106.409	103.735	100.217	163.91	136.97	178.51	174.067	114.7	114.13
ENSDARG00000019418	564522	kcnj2a	protein_coding	ZFIN	potassium inwardly-rectifying channel, subfamily J, member 2a [Source:ZFIN;Acc:ZDB-GENE-120319-1]	0.72209	3.33332	14.44	0.00014467	0.0196	152.67	148.833	143.787	233.78	195.36	254.6	287.111	189.19	188.25
ENSDARG00000057338	553169	gstp2	protein_coding	ZFIN	glutathione S-transferase pi 2 [Source:ZFIN;Acc:ZDB-GENE-050601-1]	0.71862	4.02961	14.884	0.0001143	0.01667	262.368	255.775	247.102	400.74	334.87	436.42	415.838	274.01	272.65
ENSDARG00000097826	100005128	si:dkey-239b22.2	protein_coding	ZFIN	si:dkey-239b22.2 [Source:ZFIN;Acc:ZDB-GENE-131120-8]	0.71428	3.15476	14.604	0.00013265	0.018557	144.102	140.481	135.718	219.48	183.4	239.02	217.898	143.58	142.87
ENSDARG00000013871	393654	slc5a1	protein_coding	ZFIN	solute carrier family 5 (sodium/glucose cotransporter), member 1 [Source:ZFIN;Acc:ZDB-GENE-040426-1524]	0.71288	5.81578	28.198	1.095e-07	6.3332e-05	921.127	897.98	867.533	1401.1	1170.8	1525.9	1371.74	903.89	899.39
ENSDARG00000060265	100332066	PPP1R27 (2 of 2)	protein_coding	HGNC Symbol	protein phosphatase 1, regulatory subunit 27 [Source:HGNC Symbol;Acc:HGNC:16813]	0.70451	2.18082	12.712	0.00036323	0.038333	74.3528	72.4844	70.0267	112.52	94.021	122.53	105.122	69.269	68.924
ENSDARG00000059815	790945	oaz2b	protein_coding	ZFIN	ornithine decarboxylase antizyme 2b [Source:ZFIN;Acc:ZDB-GENE-070313-1]	0.69998	4.49016	17.211	3.3456e-05	0.0066201	322.904	314.789	304.116	486.85	406.83	530.2	681.522	449.08	446.85
ENSDARG00000033140	393673	desi1a	protein_coding	ZFIN	desumoylating isopeptidase 1a [Source:ZFIN;Acc:ZDB-GENE-040426-1657]	0.69921	6.27831	25.599	4.2029e-07	0.00020389	1223.31	1192.57	1152.13	1843.2	1540.2	2007.3	2123.93	1399.5	1392.6
ENSDARG00000089885	449947	slc16a12b	protein_coding	ZFIN	solute carrier family 16 (monocarboxylic acid transporters), member 12b [Source:ZFIN;Acc:ZDB-GENE-050522-80]	0.6965	4.73132	12.329	0.000446	0.045783	361.915	352.821	340.858	544.35	454.87	592.82	824.497	543.29	540.59
ENSDARG00000038199	402979	cda	protein_coding	ZFIN	cytidine deaminase [Source:ZFIN;Acc:ZDB-GENE-040426-1911]	0.69549	4.84558	14.587	0.00013385	0.018638	424.916	414.239	400.193	638.64	533.67	695.51	906.151	597.1	594.12
ENSDARG00000028098	503885	fut9d	protein_coding	ZFIN	fucosyltransferase 9d [Source:ZFIN;Acc:ZDB-GENE-050309-15]	0.69217	5.34064	19.819	8.5149e-06	0.0022567	738.162	719.612	695.213	1106.8	924.9	1205.4	847.654	558.55	555.77
ENSDARG00000071219	406311	pik3r3a	protein_coding	ZFIN	phosphoinositide-3-kinase, regulatory subunit 3a (gamma) [Source:ZFIN;Acc:ZDB-GENE-040426-1978]	0.69126	5.46259	18.35	1.8381e-05	0.0042857	657.46	640.939	619.207	985.22	823.28	1072.9	1257.17	828.4	824.27
ENSDARG00000061368	767805	klf13	protein_coding	ZFIN	Kruppel-like factor 13 [Source:ZFIN;Acc:ZDB-GENE-060929-1274]	0.68615	4.71694	24.445	7.6448e-07	0.00032385	371.081	361.756	349.49	554.14	463.05	603.48	856.447	564.35	561.54
ENSDARG00000044086	436610	pnpla3	protein_coding	ZFIN	patatin-like phospholipase domain containing 3 [Source:ZFIN;Acc:ZDB-GENE-040718-27]	0.68144	5.05156	16.984	3.7689e-05	0.0073608	515.964	502.998	485.943	767.95	641.72	836.33	941.175	620.18	617.09
ENSDARG00000017034	550580	sqrdl	protein_coding	ZFIN	sulfide quinone reductase-like (yeast) [Source:ZFIN;Acc:ZDB-GENE-050417-436]	0.68128	4.06951	19.816	8.5261e-06	0.0022567	285.639	278.461	269.02	425.13	355.25	462.98	390.783	257.5	256.22
ENSDARG00000087303	140817	cebpd	protein_coding	ZFIN	CCAAT/enhancer binding protein (C/EBP), delta [Source:ZFIN;Acc:ZDB-GENE-020111-4]	0.68026	6.19553	16.543	4.7562e-05	0.0086176	1235.57	1204.52	1163.68	1837.4	1535.4	2001	1798.66	1185.2	1179.3
ENSDARG00000007709	569618	adamts8a	protein_coding	ZFIN	ADAM metallopeptidase with thrombospondin type 1 motif, 8a [Source:ZFIN;Acc:ZDB-GENE-060526-202]	0.6766	3.27566	21.478	3.5784e-06	0.0011329	153.457	149.601	144.529	227.69	190.26	247.96	259.239	170.82	169.97
ENSDARG00000077726	572044	ccrn4la	protein_coding	ZFIN	CCR4 carbon catabolite repression 4-like a (S. cerevisiae) [Source:ZFIN;Acc:ZDB-GENE-050208-306]	0.67043	3.82931	17.839	2.4042e-05	0.0050577	209.373	204.112	197.191	309.3	258.46	336.84	446.5	294.22	292.75
ENSDARG00000009505	378855	slmo2	protein_coding	ZFIN	slowmo homolog 2 (Drosophila) [Source:ZFIN;Acc:ZDB-GENE-031002-13]	0.66884	6.39827	43.949	3.3699e-11	5.9622e-08	1241.56	1210.36	1169.32	1831.8	1530.7	1994.9	2625.35	1730	1721.3
ENSDARG00000077176	558116	zgc:174888	protein_coding	ZFIN	zgc:174888 [Source:ZFIN;Acc:ZDB-GENE-030328-33]	0.66723	3.90115	19.483	1.0151e-05	0.0025656	265.812	259.133	250.347	391.79	327.39	426.67	303.45	199.96	198.96
ENSDARG00000043154	555812	ucp2	protein_coding	ZFIN	uncoupling protein 2 [Source:ZFIN;Acc:ZDB-GENE-990708-8]	0.66145	7.34303	29.441	5.7637e-08	4.1275e-05	2287.19	2229.71	2154.11	3357.1	2805.3	3656	5376.48	3542.8	3525.1
ENSDARG00000041169	393376	hif1al	protein_coding	ZFIN	hypoxia-inducible factor 1, alpha subunit, like [Source:ZFIN;Acc:ZDB-GENE-040426-1315]	0.65983	7.92533	22.398	2.2161e-06	0.00075743	3572.9	3483.12	3365.02	5238.4	4377.3	5704.8	7723.16	5089.1	5063.8
ENSDARG00000037495	403309	rtn4rl2b	protein_coding	ZFIN	reticulon 4 receptor-like 2b [Source:ZFIN;Acc:ZDB-GENE-040310-2]	0.65864	3.10965	19.172	1.1947e-05	0.0028978	132.833	129.495	125.105	194.66	162.66	211.99	245.909	162.04	161.23
ENSDARG00000097082	559250	im:7152348	protein_coding	ZFIN	im:7152348 [Source:ZFIN;Acc:ZDB-GENE-041111-308]	0.65586	3.33812	14.835	0.00011733	0.016884	160.295	156.267	150.968	234.44	195.9	255.31	275.776	181.72	180.81
ENSDARG00000057992	566538	fstb	protein_coding	ZFIN	follistatin b [Source:ZFIN;Acc:ZDB-GENE-031118-139]	0.65335	4.71063	30.768	2.9076e-08	2.133e-05	435.451	424.509	410.115	635.63	531.15	692.23	661.238	435.72	433.55
ENSDARG00000011573	797269	abcb11a	protein_coding	ZFIN	ATP-binding cassette, sub-family B (MDR/TAP), member 11a [Source:ZFIN;Acc:ZDB-GENE-050517-13]	0.6527	3.91074	15.906	6.6555e-05	0.01106	243.138	237.028	228.991	354.78	296.47	386.37	391.069	257.69	256.41
ENSDARG00000086665	NA	si:dkey-175g6.2	processed_transcript	ZFIN	si:dkey-175g6.2 [Source:ZFIN;Acc:ZDB-GENE-030131-8061]	0.65106	4.89399	23.659	1.1503e-06	0.00046129	446.913	435.683	420.911	651.33	544.27	709.32	905.7	596.8	593.83
ENSDARG00000058953	368620	abcc4	protein_coding	ZFIN	ATP-binding cassette, sub-family C (CFTR/MRP), member 4 [Source:ZFIN;Acc:ZDB-GENE-030616-511]	0.64795	5.96558	26.034	3.3551e-07	0.00017104	1023.48	997.758	963.927	1488.3	1243.7	1620.8	1649.59	1087	1081.6
ENSDARG00000016188	100002292	SBNO2 (2 of 2)	protein_coding	HGNC Symbol	strawberry notch homolog 2 (Drosophila) [Source:HGNC Symbol;Acc:HGNC:29158]	0.64438	5.79408	25.388	4.6871e-07	0.0002222	926.425	903.145	872.522	1343.8	1123	1463.5	1390.8	916.45	911.89
ENSDARG00000088813	100001260	ppp1r3ab	protein_coding	ZFIN	protein phosphatase 1, regulatory subunit 3Ab [Source:ZFIN;Acc:ZDB-GENE-050309-246]	0.64067	3.43493	16.419	5.0771e-05	0.0090896	180.624	176.085	170.114	261.39	218.43	284.67	269.229	177.41	176.52
ENSDARG00000042807	567144	slc16a4	protein_coding	ZFIN	solute carrier family 16 (monocarboxylic acid transporters), member 4 [Source:ZFIN;Acc:ZDB-GENE-070112-602]	0.63985	4.71298	15.79	7.0763e-05	0.01163	390.257	380.451	367.551	564.36	471.6	614.61	815.039	537.06	534.39
ENSDARG00000038822	559502	mrc1b	protein_coding	ZFIN	mannose receptor, C type 1b [Source:ZFIN;Acc:ZDB-GENE-070705-13]	0.63962	4.3263	13.022	0.00030792	0.034285	341.593	333.009	321.718	493.92	412.73	537.9	475.452	313.29	311.73
ENSDARG00000077201	566034	myo7bb	protein_coding	ZFIN	myosin VIIBb [Source:ZFIN;Acc:ZDB-GENE-070912-482]	0.63898	5.7471	25.209	5.143e-07	0.00023798	890.521	868.143	838.707	1286.9	1075.4	1401.5	1391.56	916.95	912.38
ENSDARG00000016132	321837	keap1a	protein_coding	ZFIN	kelch-like ECH-associated protein 1a [Source:ZFIN;Acc:ZDB-GENE-030131-556]	0.63472	4.59585	21.497	3.5433e-06	0.0011329	385.626	375.936	363.189	555.68	464.35	605.16	674.422	444.4	442.19
ENSDARG00000031336	368367	hsd20b2	protein_coding	ZFIN	hydroxysteroid (20-beta) dehydrogenase 2 [Source:ZFIN;Acc:ZDB-GENE-030804-21]	0.63377	5.10069	21.672	3.2354e-06	0.0010812	526.716	513.481	496.07	758.47	633.8	826.01	1036.52	683.01	679.6
ENSDARG00000036848	393221	slc43a2a	protein_coding	ZFIN	solute carrier family 43, member 2a [Source:ZFIN;Acc:ZDB-GENE-040426-964]	0.63283	7.0111	14.636	0.00013039	0.018412	1922.14	1873.84	1810.31	2765.9	2311.3	3012.2	4087.83	2693.6	2680.2
ENSDARG00000077310	571770	gpr144	protein_coding	ZFIN	G protein-coupled receptor 144 [Source:ZFIN;Acc:ZDB-GENE-081104-190]	0.63154	4.33003	16.858	4.0275e-05	0.0077157	334.359	325.957	314.905	480.76	401.73	523.56	516.414	340.29	338.59
ENSDARG00000060008	560376	HHIPL2	protein_coding	HGNC Symbol	HHIP-like 2 [Source:HGNC Symbol;Acc:HGNC:25842]	0.63142	3.98601	13.542	0.00023326	0.028176	273.651	266.775	257.729	393.45	328.78	428.48	380.029	250.42	249.17
ENSDARG00000086272	562872	si:dkey-4p15.5	protein_coding	ZFIN	si:dkey-4p15.5 [Source:ZFIN;Acc:ZDB-GENE-121214-193]	0.62607	5.88508	19.445	1.0354e-05	0.0025738	908.248	885.425	855.403	1300.9	1087	1416.7	1729.28	1139.5	1133.8
ENSDARG00000040815	325958	tsku	protein_coding	ZFIN	tsukushi small leucine rich proteoglycan homolog (Xenopus laevis) [Source:ZFIN;Acc:ZDB-GENE-030131-4683]	0.62487	4.54093	20.166	7.0989e-06	0.0019955	403.073	392.944	379.621	576.87	482.05	628.23	551.607	363.48	361.67
ENSDARG00000090337	100002463	pprc1	protein_coding	ZFIN	peroxisome proliferator-activated receptor gamma, coactivator-related 1 [Source:ZFIN;Acc:ZDB-GENE-030131-9858]	0.6209	4.68851	16.003	6.3232e-05	0.010806	428.393	417.628	403.468	611.42	510.92	665.86	653.24	430.45	428.3
ENSDARG00000073786	100151256	cmbl	protein_coding	ZFIN	carboxymethylenebutenolidase-like (Pseudomonas) [Source:ZFIN;Acc:ZDB-GENE-071004-21]	0.61575	3.93868	23.758	1.0923e-06	0.00044395	257.154	250.692	242.192	365.74	305.62	398.3	390.266	257.16	255.88
ENSDARG00000045842	503753	zgc:113263	protein_coding	ZFIN	zgc:113263 [Source:ZFIN;Acc:ZDB-GENE-050306-34]	0.61179	5.27279	21.309	3.9093e-06	0.0012103	607.83	592.556	572.464	862.03	720.34	938.78	1123.18	740.11	736.42
ENSDARG00000041566	565145	adamts1	protein_coding	ZFIN	ADAM metallopeptidase with thrombospondin type 1 motif, 1 [Source:ZFIN;Acc:ZDB-GENE-070814-1]	0.61118	4.40857	18.042	2.1609e-05	0.004779	350.266	341.465	329.887	496.57	414.95	540.78	564.763	372.14	370.29
ENSDARG00000079385	101884886	79385	protein_coding			0.60702	3.00531	13.125	0.00029142	0.033076	131.741	128.43	124.076	186.27	155.65	202.85	211.5	139.37	138.67
ENSDARG00000028173	566075	slc4a2a	protein_coding	ZFIN	solute carrier family 4, anion exchanger, member 2a [Source:ZFIN;Acc:ZDB-GENE-051101-2]	0.60214	5.14581	23.047	1.5807e-06	0.00059428	571.598	557.234	538.34	805.24	672.88	876.94	988.561	651.4	648.16
ENSDARG00000044146	563923	lrrc8db	protein_coding	ZFIN	leucine rich repeat containing 8 family, member Db [Source:ZFIN;Acc:ZDB-GENE-061013-487]	0.60144	4.7401	19.672	9.1958e-06	0.0023843	442.748	431.622	416.987	623.44	520.96	678.95	710.595	468.24	465.91
ENSDARG00000002196	553688	bach1	protein_coding	ZFIN	BTB and CNC homology 1, basic leucine zipper transcription factor 1 [Source:ZFIN;Acc:ZDB-GENE-050522-220]	0.59455	4.3251	15.129	0.0001004	0.015099	335.412	326.984	315.897	470.06	392.8	511.92	516.825	340.56	338.86
ENSDARG00000060439	563453	CLCN2 (1 of 3)	protein_coding	HGNC Symbol	chloride channel, voltage-sensitive 2 [Source:HGNC Symbol;Acc:HGNC:2020]	0.59391	4.52742	14.877	0.00011473	0.01667	378.031	368.532	356.036	529.55	442.5	576.7	632.996	417.11	415.03
ENSDARG00000041602	436726	MMADHC (2 of 2)	protein_coding	HGNC Symbol	methylmalonic aciduria (cobalamin deficiency) cblD type, with homocystinuria [Source:HGNC Symbol;Acc:HGNC:25221]	0.58871	4.06649	15.409	8.6588e-05	0.013564	262.471	255.876	247.2	366.37	306.15	398.99	479.132	315.72	314.15
ENSDARG00000037099	393285	IRS2	protein_coding	HGNC Symbol	insulin receptor substrate 2 [Source:HGNC Symbol;Acc:HGNC:6126]	0.58838	6.85225	13.005	0.00031064	0.034285	1825.82	1779.94	1719.59	2547.6	2128.8	2774.4	3508.84	2312.1	2300.6
ENSDARG00000034961	406812	bzw1b	protein_coding	ZFIN	basic leucine zipper and W2 domains 1b [Source:ZFIN;Acc:ZDB-GENE-040426-2881]	0.58759	6.07362	15.26	9.3677e-05	0.014375	1073.72	1046.74	1011.24	1497.4	1251.2	1630.7	1981.33	1305.6	1299.1
ENSDARG00000056141	550442	coq10b	protein_coding	ZFIN	coenzyme Q10 homolog B (S. cerevisiae) [Source:ZFIN;Acc:ZDB-GENE-050417-263]	0.58728	4.28313	19.876	8.265e-06	0.0022395	331.517	323.186	312.228	462.27	386.28	503.43	493.435	325.14	323.52
ENSDARG00000062460	564523	C24H8orf44	protein_coding	HGNC Symbol	C8orf44-SGK3 readthrough [Source:HGNC Symbol;Acc:HGNC:48354]	0.58444	5.02219	17.329	3.1433e-05	0.0062611	540.495	526.913	509.047	752.14	628.51	819.11	876.593	577.62	574.75
ENSDARG00000005690	561939	si:ch211-196h16.11	protein_coding	ZFIN	si:ch211-196h16.11 [Source:ZFIN;Acc:ZDB-GENE-121214-154]	0.58434	5.8583	13.291	0.00026673	0.030756	929.518	906.161	875.436	1293.4	1080.8	1408.5	1669.26	1099.9	1094.5
ENSDARG00000062476	492409	snapc5	protein_coding	ZFIN	small nuclear RNA activating complex, polypeptide 5 [Source:ZFIN;Acc:ZDB-GENE-041111-50]	0.5816	4.48636	15.922	6.5991e-05	0.01106	344.934	336.266	324.864	479.08	400.34	521.74	677.413	446.37	444.15
ENSDARG00000053091	368323	BDP1 (1 of 2)	protein_coding	HGNC Symbol	B double prime 1, subunit of RNA polymerase III transcription initiation factor IIIB [Source:HGNC Symbol;Acc:HGNC:13652]	0.58062	5.37404	21.649	3.2741e-06	0.0010821	691.804	674.419	651.552	960.14	802.32	1045.6	1109.89	731.35	727.71
ENSDARG00000016200	405805	trib3	protein_coding	ZFIN	tribbles homolog 3 (Drosophila) [Source:ZFIN;Acc:ZDB-GENE-040426-2609]	0.57183	5.13004	18.434	1.7587e-05	0.0041325	577.572	563.058	543.967	796.74	665.78	867.68	973.907	641.75	638.55
ENSDARG00000018342	569014	ggt1b	protein_coding	ZFIN	gamma-glutamyltransferase 1b [Source:ZFIN;Acc:ZDB-GENE-110408-13]	0.57154	3.30709	12.356	0.00043965	0.045441	181.833	177.264	171.254	250.82	209.59	273.16	210.252	138.54	137.85
ENSDARG00000061256	567109	FAM195A	protein_coding	HGNC Symbol	family with sequence similarity 195, member A [Source:HGNC Symbol;Acc:HGNC:14142]	0.56759	3.93088	14.156	0.00016828	0.022164	250.439	244.145	235.867	344.49	287.87	375.16	423.701	279.19	277.8
ENSDARG00000055412	449707	mylk4b	protein_coding	ZFIN	myosin light chain kinase family, member 4b [Source:ZFIN;Acc:ZDB-GENE-041001-128]	0.56625	3.43106	12.156	0.00048922	0.049377	168.689	164.45	158.875	231.84	193.74	252.49	320.695	211.32	210.27
ENSDARG00000042751	445220	riok3	protein_coding	ZFIN	RIO kinase 3 (yeast) [Source:ZFIN;Acc:ZDB-GENE-040801-133]	0.56476	5.57911	23.496	1.252e-06	0.00048279	834.622	813.649	786.061	1145.7	957.36	1247.7	1179.58	777.27	773.4
ENSDARG00000013721	563180	g6pca.2	protein_coding	ZFIN	glucose-6-phosphatase a, catalytic, tandem duplicate 2 [Source:ZFIN;Acc:ZDB-GENE-050309-17]	0.56376	7.55265	13.96	0.00018679	0.024009	2961.22	2886.81	2788.92	4061.9	3394.2	4423.5	5564.14	3666.4	3648.2
ENSDARG00000094210	NA	zgc:109934	protein_coding	ZFIN	zgc:109934 [Source:ZFIN;Acc:ZDB-GENE-050522-428]	0.56361	4.57147	13.642	0.00022113	0.027258	359.154	350.129	338.257	492.65	411.67	536.51	771.941	508.66	506.13
ENSDARG00000015343	406762	pgd	protein_coding	ZFIN	phosphogluconate hydrogenase [Source:ZFIN;Acc:ZDB-GENE-040426-2807]	0.56047	6.07899	19.452	1.0317e-05	0.0025738	1143.77	1115.03	1077.22	1565.4	1308.1	1704.7	1793	1181.5	1175.6
ENSDARG00000030498	100006778	il6st	protein_coding	ZFIN	interleukin 6 signal transducer [Source:ZFIN;Acc:ZDB-GENE-080104-6]	0.55974	6.68899	23.563	1.2089e-06	0.00047219	1883.99	1836.64	1774.37	2577.1	2153.5	2806.5	2323.06	1530.8	1523.1
ENSDARG00000011618	557046	slc26a2	protein_coding	ZFIN	solute carrier family 26 (sulfate transporter), member 2 [Source:ZFIN;Acc:ZDB-GENE-030717-3]	0.55959	4.96253	15.648	7.6309e-05	0.012273	507.076	494.334	477.573	693.59	579.58	755.34	886.31	584.03	581.12
ENSDARG00000070480	335616	agr2	protein_coding	ZFIN	anterior gradient homolog 2 (Xenopus laevis) [Source:ZFIN;Acc:ZDB-GENE-050417-214]	0.55588	5.68231	15.987	6.3767e-05	0.010836	1002.79	977.59	944.443	1368.1	1143.2	1489.9	968.441	638.14	634.97
ENSDARG00000055118	565911	mylipb	protein_coding	ZFIN	myosin regulatory light chain interacting protein b [Source:ZFIN;Acc:ZDB-GENE-061027-67]	0.55363	4.75965	15.07	0.00010357	0.015343	426.898	416.171	402.06	581.52	485.94	633.3	789.985	520.55	517.96
ENSDARG00000018953	333974	gclm	protein_coding	ZFIN	glutamate-cysteine ligase, modifier subunit [Source:ZFIN;Acc:ZDB-GENE-030131-5906]	0.55189	4.00915	12.467	0.00041431	0.043268	280.475	273.427	264.156	381.62	318.9	415.6	400.49	263.9	262.58
ENSDARG00000091260	566845	mylk4a	protein_coding	ZFIN	myosin light chain kinase family, member 4a [Source:ZFIN;Acc:ZDB-GENE-120824-2]	0.54995	5.25539	17.587	2.7446e-05	0.0055777	631.556	615.686	594.81	858.09	717.04	934.5	1079.1	711.06	707.52
ENSDARG00000022424	322846	slc26a5	protein_coding	ZFIN	solute carrier family 26, member 5 [Source:ZFIN;Acc:ZDB-GENE-030131-1566]	0.54514	5.45934	19.983	7.8131e-06	0.0021363	724.17	705.972	682.035	980.64	819.45	1068	1242.98	819.05	814.97
ENSDARG00000038401	553686	tefb	protein_coding	ZFIN	thyrotroph embryonic factor b [Source:ZFIN;Acc:ZDB-GENE-050522-224]	0.54371	8.32579	13.448	0.00024532	0.029131	5320.25	5186.56	5010.7	7197	6014	7837.8	9122.95	6011.5	5981.5
ENSDARG00000029493	678552	f9b	protein_coding	ZFIN	coagulation factor IXb [Source:ZFIN;Acc:ZDB-GENE-060421-7346]	0.54273	4.15115	12.919	0.0003252	0.035174	282.589	275.488	266.147	382.06	319.26	416.08	540.544	356.19	354.41
ENSDARG00000028017	568021	tp53inp1	protein_coding	ZFIN	tumor protein p53 inducible nuclear protein 1 [Source:ZFIN;Acc:ZDB-GENE-031018-3]	0.53945	4.9731	14.344	0.00015228	0.020538	498.965	486.427	469.934	673.03	562.4	732.96	940.828	619.95	616.86
ENSDARG00000015709	327417	hsd17b12a	protein_coding	ZFIN	hydroxysteroid (17-beta) dehydrogenase 12a [Source:ZFIN;Acc:ZDB-GENE-030131-5628]	0.5385	5.46934	19.39	1.0655e-05	0.0026269	719.342	701.266	677.489	969.63	810.25	1056	1283.81	845.96	841.74
ENSDARG00000054848	561007	pdk4	protein_coding	ZFIN	pyruvate dehydrogenase kinase, isozyme 4 [Source:ZFIN;Acc:ZDB-GENE-060503-754]	0.5337	4.94338	14.488	0.00014109	0.019289	520.194	507.122	489.927	698.87	584	761.1	841.703	554.63	551.87
ENSDARG00000041787	322617	cx32.3	protein_coding	ZFIN	connexin 32.3 [Source:ZFIN;Acc:ZDB-GENE-030131-1337]	0.53354	4.26945	12.818	0.00034333	0.036489	333.008	324.64	313.633	447.36	373.83	487.2	497.376	327.74	326.11
ENSDARG00000074686	324487	mgea5	protein_coding	ZFIN	meningioma expressed antigen 5 (hyaluronidase) [Source:ZFIN;Acc:ZDB-GENE-030131-3208]	0.53307	7.33333	17.838	2.4047e-05	0.0050577	2824.65	2753.67	2660.31	3793	3169.5	4130.7	4172.14	2749.2	2735.5
ENSDARG00000008697	566886	epas1a	protein_coding	ZFIN	endothelial PAS domain protein 1a [Source:ZFIN;Acc:ZDB-GENE-030131-4490]	0.53114	6.92008	15.465	8.4052e-05	0.013305	2105.84	2052.92	1983.31	2824	2359.8	3075.4	3186.1	2099.4	2089
ENSDARG00000038785	336770	abcf2a	protein_coding	ZFIN	ATP-binding cassette, sub-family F (GCN20), member 2a [Source:ZFIN;Acc:ZDB-GENE-030131-8714]	0.52884	6.30629	15.098	0.00010207	0.015199	1325.16	1291.86	1248.06	1774.3	1482.6	1932.2	2211.22	1457.1	1449.8
ENSDARG00000059035	327556	POR (2 of 2)	protein_coding	HGNC Symbol	P450 (cytochrome) oxidoreductase [Source:HGNC Symbol;Acc:HGNC:9208]	0.52162	6.87568	14.567	0.00013529	0.018665	1956.42	1907.26	1842.59	2606.4	2178	2838.4	3304.74	2177.6	2166.8
ENSDARG00000029766	565875	nr1i2	protein_coding	ZFIN	nuclear receptor subfamily 1, group I, member 2 [Source:ZFIN;Acc:ZDB-GENE-030903-3]	0.52136	4.61319	18.529	1.6732e-05	0.0039625	391.984	382.134	369.177	522.15	436.33	568.65	730.576	481.41	479.01
ENSDARG00000074526	569773	zbtb16b	protein_coding	ZFIN	zinc finger and BTB domain containing 16b [Source:ZFIN;Acc:ZDB-GENE-100923-1]	0.51553	4.87756	15.71	7.384e-05	0.01194	465.786	454.081	438.685	617.95	516.38	672.97	903.418	595.3	592.33
ENSDARG00000061081	564134	arpp21	protein_coding	ZFIN	cyclic AMP-regulated phosphoprotein, 21 [Source:ZFIN;Acc:ZDB-GENE-081104-296]	0.51204	4.7085	15.427	8.5741e-05	0.013502	446.477	435.258	420.5	590.9	493.78	643.52	703.476	463.55	461.24
ENSDARG00000058285	449677	cpt1b	protein_coding	ZFIN	carnitine palmitoyltransferase 1B (muscle) [Source:ZFIN;Acc:ZDB-GENE-041010-9]	0.50757	4.15188	14.722	0.00012461	0.017679	279.926	272.892	263.639	369.35	308.64	402.24	547.442	360.73	358.93
ENSDARG00000037012	399488	slc3a2b	protein_coding	ZFIN	solute carrier family 3, member 2b [Source:ZFIN;Acc:ZDB-GENE-040122-2]	0.50425	7.08015	16.583	4.6579e-05	0.0084906	2147.22	2093.26	2022.29	2826.3	2361.7	3078	4256	2804.4	2790.5
ENSDARG00000040705	564746	glsb	protein_coding	ZFIN	glutaminase b [Source:ZFIN;Acc:ZDB-GENE-030616-550]	0.50151	5.93973	18.007	2.2008e-05	0.0048315	1072.59	1045.64	1010.19	1409.2	1177.5	1534.6	1601.73	1055.4	1050.2
ENSDARG00000053449	30211	pyya	protein_coding	ZFIN	peptide YYa [Source:ZFIN;Acc:ZDB-GENE-980526-71]	0.50036	3.5166	13.608	0.00022519	0.027532	195.126	190.223	183.773	256.19	214.08	279	307.191	202.42	201.41
ENSDARG00000013144	64267	atp1b1a	protein_coding	ZFIN	ATPase, Na+/K+ transporting, beta 1a polypeptide [Source:ZFIN;Acc:ZDB-GENE-001127-3]	0.50004	8.56671	16.641	4.5163e-05	0.008385	6840.68	6668.78	6442.67	8977.8	7502.1	9777.2	9236.61	6086.4	6056.1
ENSDARG00000005704	393332	eps8l3	protein_coding	ZFIN	EPS8-like 3 [Source:ZFIN;Acc:ZDB-GENE-040426-1335]	0.49743	4.11514	12.995	0.00031234	0.034285	310.098	302.305	292.055	406.29	339.51	442.46	426.815	281.25	279.84
ENSDARG00000039931	406436	slc25a33	protein_coding	ZFIN	solute carrier family 25, member 33 [Source:ZFIN;Acc:ZDB-GENE-040426-2183]	0.49159	5.37684	13.709	0.00021344	0.026638	662.591	645.941	624.039	864.56	722.45	941.54	1316.73	867.64	863.32
ENSDARG00000076833	64273	atp1b1b	protein_coding	ZFIN	ATPase, Na+/K+ transporting, beta 1b polypeptide [Source:ZFIN;Acc:ZDB-GENE-001127-4]	0.4862	7.47076	14.26	0.0001592	0.021094	3167.71	3088.11	2983.41	4117.7	3440.8	4484.3	4484.6	2955.1	2940.4
ENSDARG00000071021	777719	papss2a	protein_coding	ZFIN	3'-phosphoadenosine 5'-phosphosulfate synthase 2a [Source:ZFIN;Acc:ZDB-GENE-061110-85]	0.48018	6.29083	18.252	1.935e-05	0.0043941	1475.21	1438.14	1389.38	1909.6	1595.8	2079.7	1765.73	1163.5	1157.7
ENSDARG00000078567	567909	lonrf1l	protein_coding	ZFIN	LON peptidase N-terminal domain and ring finger 1, like [Source:ZFIN;Acc:ZDB-GENE-081104-397]	0.47537	4.77236	16.219	5.6424e-05	0.0099244	473.306	461.413	445.768	610.68	510.3	665.06	736.105	485.05	482.63
ENSDARG00000058992	565295	cers2b	protein_coding	ZFIN	ceramide synthase 2b [Source:ZFIN;Acc:ZDB-GENE-110408-40]	0.47483	5.32401	15.576	7.9235e-05	0.012676	734.754	716.291	692.004	947.63	791.87	1032	958.765	631.77	628.62
ENSDARG00000060854	569113	kctd3	protein_coding	ZFIN	potassium channel tetramerisation domain containing 3 [Source:ZFIN;Acc:ZDB-GENE-060503-169]	0.47359	5.24106	15.72	7.3456e-05	0.01194	608.862	593.562	573.436	784.6	655.64	854.46	1157.98	763.04	759.24
ENSDARG00000022712	30767	stat3	protein_coding	ZFIN	signal transduction and activation of transcription 3 [Source:ZFIN;Acc:ZDB-GENE-980526-68]	0.45981	5.98355	16.682	4.4208e-05	0.0083103	1143.75	1115.01	1077.21	1459.8	1219.9	1589.8	1597.48	1052.6	1047.4
ENSDARG00000028957	393307	maff	protein_coding	ZFIN	v-maf musculoaponeurotic fibrosarcoma oncogene homolog f (avian) [Source:ZFIN;Acc:ZDB-GENE-040426-1280]	0.45419	6.16688	16.134	5.9025e-05	0.010264	1267.33	1235.48	1193.59	1611.3	1346.4	1754.7	1912.93	1260.5	1254.2
ENSDARG00000086826	322462	sult6b1	protein_coding	ZFIN	sulfotransferase family, cytosolic, 6b, member 1 [Source:ZFIN;Acc:ZDB-GENE-050417-228]	0.45416	6.5574	13.935	0.00018919	0.024214	1736.46	1692.82	1635.43	2207.6	1844.8	2404.2	2269.08	1495.2	1487.7
ENSDARG00000022165	431762	mgst1.2	protein_coding	ZFIN	microsomal glutathione S-transferase 1.2 [Source:ZFIN;Acc:ZDB-GENE-040704-59]	0.43592	5.22976	13.014	0.00030914	0.034285	728.497	710.191	686.111	914.56	764.23	995.99	801.835	528.36	525.73
ENSDARG00000044719	335551	nrsn1	protein_coding	ZFIN	neurensin 1 [Source:ZFIN;Acc:ZDB-GENE-030131-7491]	0.433	6.4412	14.474	0.00014212	0.019342	1455.63	1419.05	1370.94	1823.7	1523.9	1986.1	2571.69	1694.6	1686.1
ENSDARG00000010641	321541	slc20a1b	protein_coding	ZFIN	solute carrier family 20, member 1b [Source:ZFIN;Acc:ZDB-GENE-030131-260]	0.42774	6.83797	17.094	3.5568e-05	0.006992	2043.09	1991.75	1924.22	2550.3	2131.1	2777.4	3036.51	2000.9	1990.9
ENSDARG00000061233	336147	abcc5	protein_coding	ZFIN	ATP-binding cassette, sub-family C (CFTR/MRP), member 5 [Source:ZFIN;Acc:ZDB-GENE-050517-17]	0.42204	7.28686	15.264	9.3476e-05	0.014375	2468.64	2406.61	2325.01	3069.4	2564.9	3342.7	5079.51	3347.1	3330.4
ENSDARG00000071065	570579	g6pd	protein_coding	ZFIN	glucose-6-phosphate dehydrogenase [Source:ZFIN;Acc:ZDB-GENE-070508-4]	0.41599	6.41587	12.937	0.00032207	0.034971	1597.23	1557.09	1504.3	1977.6	1652.5	2153.7	2078.34	1369.5	1362.7
ENSDARG00000061375	100037312	sgpl1	protein_coding	ZFIN	sphingosine-1-phosphate lyase 1 [Source:ZFIN;Acc:ZDB-GENE-070410-24]	0.41199	7.41243	13.154	0.00028687	0.032684	3184.11	3104.1	2998.85	3931.4	3285.2	4281.5	4175.52	2751.4	2737.7
ENSDARG00000019301	NA	sec14l1	protein_coding	ZFIN	SEC14-like 1 (S. cerevisiae) [Source:ZFIN;Acc:ZDB-GENE-040426-801]	0.39834	5.23431	13.154	0.00028688	0.032684	660.049	643.463	621.645	807.33	674.62	879.21	1052.16	693.31	689.86
ENSDARG00000044167	386792	padi2	protein_coding	ZFIN	peptidyl arginine deiminase, type II [Source:ZFIN;Acc:ZDB-GENE-031116-67]	0.39627	5.64171	13.896	0.00019318	0.02462	961.782	937.614	905.822	1174.7	981.59	1279.3	1154.61	760.82	757.03
ENSDARG00000063229	561138	xpo1b	protein_coding	ZFIN	exportin 1 (CRM1 homolog, yeast) b [Source:ZFIN;Acc:ZDB-GENE-070530-6]	0.3904	7.33491	13.487	0.0002402	0.028783	2874.36	2802.13	2707.12	3496.3	2921.6	3807.6	4433.43	2921.4	2906.8
ENSDARG00000007173	368352	cyp2y3	protein_coding	ZFIN	cytochrome P450, family 2, subfamily Y, polypeptide 3 [Source:ZFIN;Acc:ZDB-GENE-050522-490]	0.38107	6.38074	13.568	0.00023007	0.028015	1580.09	1540.38	1488.15	1909.6	1595.7	2079.6	2029.35	1337.2	1330.6
ENSDARG00000016783	494133	srsf6b	protein_coding	ZFIN	serine/arginine-rich splicing factor 6b [Source:ZFIN;Acc:ZDB-GENE-041219-1]	-0.37245	6.36479	13.359	0.00025713	0.02986	1971.79	1922.24	1857.06	1413.4	1181.1	1539.3	2129.3	1403.1	1396.1
ENSDARG00000017843	393565	srsf1b	protein_coding	ZFIN	serine/arginine-rich splicing factor 1b [Source:ZFIN;Acc:ZDB-GENE-040426-1467]	-0.39296	7.09714	13.422	0.0002487	0.029334	3217.59	3136.74	3030.38	2273.9	1900.1	2476.4	3713.32	2446.9	2434.7
ENSDARG00000097683	569585	SPTBN5	protein_coding	HGNC Symbol	spectrin, beta, non-erythrocytic 5 [Source:HGNC Symbol;Acc:HGNC:15680]	-0.42342	5.48729	14.612	0.00013209	0.018557	1090.67	1063.26	1027.21	754.66	630.62	821.86	1153.34	759.98	756.19
ENSDARG00000007601	564460	zmynd8	protein_coding	ZFIN	zinc finger, MYND-type containing 8 [Source:ZFIN;Acc:ZDB-GENE-041119-1]	-0.43461	5.07592	15.202	9.6583e-05	0.014671	860.159	838.545	810.112	590.56	493.49	643.15	785.208	517.41	514.83
ENSDARG00000012801	561416	pfkpb	protein_coding	ZFIN	phosphofructokinase, platelet b [Source:ZFIN;Acc:ZDB-GENE-070912-634]	-0.44175	5.90452	14.84	0.00011703	0.016884	1394.09	1359.06	1312.97	952.44	795.88	1037.2	1691.98	1114.9	1109.4
ENSDARG00000029856	337142	cnn3b	protein_coding	ZFIN	calponin 3, acidic b [Source:ZFIN;Acc:ZDB-GENE-050522-263]	-0.4466	4.49492	13.4	0.00025162	0.029472	577.475	562.964	543.876	393.18	328.56	428.19	521.515	343.65	341.94
ENSDARG00000057000	553431	camkvl	protein_coding	ZFIN	CaM kinase-like vesicle-associated, like [Source:ZFIN;Acc:ZDB-GENE-090311-58]	-0.44831	5.05602	13.678	0.00021701	0.026861	784.03	764.328	738.412	533.2	445.56	580.68	918.16	605.01	602
ENSDARG00000057317	573301	nexn	protein_coding	ZFIN	nexilin (F actin binding protein) [Source:ZFIN;Acc:ZDB-GENE-041114-92]	-0.44862	4.85378	16.133	5.9037e-05	0.010264	709.346	691.521	668.074	482.3	403.02	525.25	737.411	485.91	483.49
ENSDARG00000044545	402952	zgc:77262	protein_coding	ZFIN	zgc:77262 [Source:ZFIN;Acc:ZDB-GENE-040426-1811]	-0.46679	4.02179	13.39	0.00025298	0.029492	404.716	394.546	381.168	271.72	227.06	295.91	402.483	265.21	263.89
ENSDARG00000055377	393719	gnb5b	protein_coding	ZFIN	guanine nucleotide binding protein (G protein), beta 5b [Source:ZFIN;Acc:ZDB-GENE-040426-1712]	-0.47227	5.77867	15.872	6.7779e-05	0.011201	1319.35	1286.2	1242.59	882.5	737.44	961.08	1491.36	982.72	977.82
ENSDARG00000020814	436668	faimb	protein_coding	ZFIN	Fas apoptotic inhibitory molecule b [Source:ZFIN;Acc:ZDB-GENE-040718-91]	-0.48968	4.02085	12.344	0.00044249	0.045578	405.552	395.361	381.955	267.99	223.94	291.85	405.005	266.87	265.54
ENSDARG00000032651	192329	ppp1r10	protein_coding	ZFIN	protein phosphatase 1, regulatory subunit 10 [Source:ZFIN;Acc:ZDB-GENE-020419-15]	-0.49265	7.14014	17.683	2.6102e-05	0.0054142	3662.06	3570.04	3448.99	2415.2	2018.2	2630.3	3256.22	2145.7	2135
ENSDARG00000095556	NA	zgc:77650	processed_transcript	ZFIN	zgc:77650 [Source:ZFIN;Acc:ZDB-GENE-030131-6151]	-0.50406	7.15971	13.165	0.00028527	0.032684	3561.37	3471.88	3354.16	2330.3	1947.3	2537.8	3648.4	2404.1	2392.1
ENSDARG00000011020	393467	hnrnpa1a	protein_coding	ZFIN	heterogeneous nuclear ribonucleoprotein A1a [Source:ZFIN;Acc:ZDB-GENE-040426-1546]	-0.51498	5.16459	12.913	0.00032628	0.035174	889.091	866.749	837.361	577.34	482.44	628.75	935.218	616.25	613.18
ENSDARG00000037337	556881	cnrip1b	protein_coding	ZFIN	cannabinoid receptor interacting protein 1b [Source:ZFIN;Acc:ZDB-GENE-080722-33]	-0.52019	3.59635	13.553	0.00023191	0.028126	278.124	271.135	261.942	179.93	150.35	195.95	355.601	234.32	233.15
ENSDARG00000040352	553204	crot	protein_coding	ZFIN	carnitine O-octanoyltransferase [Source:ZFIN;Acc:ZDB-GENE-050522-35]	-0.524	5.06689	13.079	0.00029865	0.033642	841.329	820.188	792.378	542.92	453.68	591.26	852.469	561.73	558.93
ENSDARG00000036162	334222	hnrnpa0b	protein_coding	ZFIN	heterogeneous nuclear ribonucleoprotein A0b [Source:ZFIN;Acc:ZDB-GENE-030131-6154]	-0.52552	6.0887	22.601	1.9934e-06	0.00069714	1754.51	1710.42	1652.42	1131	945.14	1231.8	1650.72	1087.7	1082.3
ENSDARG00000036840	406844	krt15	protein_coding	ZFIN	keratin 15 [Source:ZFIN;Acc:ZDB-GENE-040426-2931]	-0.55568	7.88216	17.889	2.3412e-05	0.0050201	5823.5	5677.17	5484.67	3676.6	3072.2	4003.9	6361.52	4191.9	4171
ENSDARG00000056080	100148873	si:dkey-191g9.5	protein_coding	ZFIN	si:dkey-191g9.5 [Source:ZFIN;Acc:ZDB-GENE-090313-217]	-0.56536	4.32806	13.793	0.00020412	0.025686	484.001	471.839	455.84	303.49	253.6	330.51	555.631	366.13	364.3
ENSDARG00000052223	570333	rcvrna	protein_coding	ZFIN	recoverin a [Source:ZFIN;Acc:ZDB-GENE-050913-106]	-0.58134	6.17156	31.744	1.7586e-08	1.3919e-05	1845.1	1798.74	1737.75	1144.3	956.22	1246.2	1834.35	1208.7	1202.7
ENSDARG00000086694	100334125	CABZ01102076.1	protein_coding	Clone-based (Ensembl)	Uncharacterized protein [Source:UniProtKB/TrEMBL;Acc:H9GZ52]	-0.59086	3.24534	16.28	5.4635e-05	0.0096662	244.82	238.668	230.575	150.8	126.01	164.23	230.909	152.16	151.4
ENSDARG00000077620	550236	cdca7a	protein_coding	ZFIN	cell division cycle associated 7a [Source:ZFIN;Acc:ZDB-GENE-050417-29]	-0.59141	4.08471	14.81	0.00011887	0.017025	489.338	477.041	460.867	301.34	251.81	328.17	297.288	195.89	194.92
ENSDARG00000053405	570613	sord	protein_coding	ZFIN	sorbitol dehydrogenase [Source:ZFIN;Acc:ZDB-GENE-040426-1231]	-0.6053	3.82298	13.809	0.00020239	0.025577	367.109	357.884	345.749	223.89	187.09	243.83	347.687	229.1	227.96
ENSDARG00000054778	100535215	pogza	protein_coding	ZFIN	pogo transposable element with ZNF domain a [Source:ZFIN;Acc:ZDB-GENE-040914-76]	-0.60799	3.02573	16.646	4.5057e-05	0.008385	214.049	208.671	201.595	130.28	108.87	141.88	191.438	126.15	125.52
ENSDARG00000093316	100537224	si:dkey-13i15.1	protein_coding	ZFIN	si:dkey-13i15.1 [Source:ZFIN;Acc:ZDB-GENE-130531-41]	-0.61582	4.36671	12.658	0.00037405	0.039336	557.608	543.596	525.165	337.62	282.13	367.69	491.064	323.58	321.97
ENSDARG00000010933	NA	CACNA1F (1 of 2)	protein_coding	HGNC Symbol	calcium channel, voltage-dependent, L type, alpha 1F subunit [Source:HGNC Symbol;Acc:HGNC:1393]	-0.62031	4.94921	19.677	9.1721e-06	0.0023843	778.335	758.776	733.048	469.82	392.6	511.66	828.65	546.03	543.31
ENSDARG00000096922	NA	si:ch211-147k10.6	lincRNA	ZFIN	si:ch211-147k10.6 [Source:ZFIN;Acc:ZDB-GENE-050208-254]	-0.65089	4.1784	12.181	0.00048289	0.048902	423.361	412.723	398.729	250.17	209.05	272.44	546.2	359.91	358.12
ENSDARG00000016363	323656	her8a	protein_coding	ZFIN	hairy-related 8a [Source:ZFIN;Acc:ZDB-GENE-030131-2376]	-0.69213	2.79251	16.691	4.3978e-05	0.0083103	169.83	165.563	159.949	97.498	81.472	106.18	193.649	127.6	126.97
ENSDARG00000038378	619268	sagb	protein_coding	ZFIN	S-antigen; retina and pineal gland (arrestin) b [Source:ZFIN;Acc:ZDB-GENE-050913-98]	-0.73688	7.07224	19.574	9.6779e-06	0.0024668	3416.73	3330.88	3217.94	1902.5	1589.8	2071.9	3752.5	2472.7	2460.4
ENSDARG00000086756	559232	RGS9BP	protein_coding	HGNC Symbol	regulator of G protein signaling 9 binding protein [Source:HGNC Symbol;Acc:HGNC:30304]	-0.74056	5.65139	22.435	2.1735e-06	0.00075139	1372.27	1337.79	1292.43	762.12	636.85	829.98	1177.14	775.67	771.8
ENSDARG00000017931	393406	ddx26b	protein_coding	ZFIN	DEAD/H (Asp-Glu-Ala-Asp/His) box polypeptide 26B [Source:ZFIN;Acc:ZDB-GENE-040426-1150]	-0.7416	4.47426	40.715	1.7615e-10	2.2962e-07	613.608	598.188	577.906	340.5	284.53	370.82	519.863	342.56	340.85
ENSDARG00000097420	NA	si:ch73-250a16.5	protein_coding	ZFIN	si:ch73-250a16.5 [Source:ZFIN;Acc:ZDB-GENE-131121-255]	-0.74361	2.03267	14.052	0.00017782	0.023052	111.887	109.075	105.377	61.961	51.777	67.478	90.992	59.958	59.66
ENSDARG00000037403	562935	HSPA8 (1 of 2)	protein_coding	HGNC Symbol	heat shock 70kDa protein 8 [Source:HGNC Symbol;Acc:HGNC:5241]	-0.75227	4.15606	16.903	3.933e-05	0.0075828	486.138	473.922	457.853	267.77	223.76	291.61	420.467	277.06	275.68
ENSDARG00000097369	NA	si:ch1073-358o18.3	lincRNA	ZFIN	si:ch1073-358o18.3 [Source:ZFIN;Acc:ZDB-GENE-131121-198]	-0.7701	5.29851	25.372	4.7281e-07	0.0002222	1091.81	1064.38	1028.29	594.05	496.41	646.95	896.677	590.86	587.91
ENSDARG00000095647	NA	si:dkeyp-67a8.3	processed_transcript	ZFIN	si:dkeyp-67a8.3 [Source:ZFIN;Acc:ZDB-GENE-070912-665]	-0.78003	1.86027	13.678	0.00021693	0.026861	99.404	96.9061	93.6203	53.668	44.847	58.447	81.4529	53.673	53.405
ENSDARG00000017388	393556	gstt1b	protein_coding	ZFIN	glutathione S-transferase theta 1b [Source:ZFIN;Acc:ZDB-GENE-040426-1491]	-0.7951	3.59837	22.666	1.9273e-06	0.00068196	342.591	333.982	322.658	183.17	153.06	199.47	272.486	179.55	178.66
ENSDARG00000089302	323529	hnrnpa0a	protein_coding	ZFIN	heterogeneous nuclear ribonucleoprotein A0a [Source:ZFIN;Acc:ZDB-GENE-030131-2249]	-0.80505	5.83185	38.812	4.6666e-10	5.2122e-07	1549.2	1510.27	1459.06	822.76	687.52	896.02	1439.11	948.29	943.56
ENSDARG00000032553	406602	egln3	protein_coding	ZFIN	egl nine homolog 3 (C. elegans) [Source:ZFIN;Acc:ZDB-GENE-040426-2541]	-0.85008	2.85522	12.589	0.00038812	0.040674	223.719	218.097	210.702	115.12	96.194	125.37	147.982	97.512	97.026
ENSDARG00000032801	560806	grk5	protein_coding	ZFIN	G protein-coupled receptor kinase 5 [Source:ZFIN;Acc:ZDB-GENE-091204-274]	-0.85225	2.56814	16.061	6.1327e-05	0.010595	161.819	157.753	152.404	83.125	69.461	90.526	144.622	95.297	94.823
ENSDARG00000071082	100003675	p4ha1b	protein_coding	ZFIN	prolyl 4-hydroxylase, alpha polypeptide I b [Source:ZFIN;Acc:ZDB-GENE-030131-4089]	-0.8572	3.87414	15.939	6.5424e-05	0.011055	464.178	452.514	437.171	237.73	198.65	258.9	276.013	181.88	180.97
ENSDARG00000027852	393311	plekhf1	protein_coding	ZFIN	pleckstrin homology domain containing, family F (with FYVE domain) member 1 [Source:ZFIN;Acc:ZDB-GENE-040426-1289]	-0.91289	3.85477	17.923	2.3005e-05	0.0049779	368.24	358.987	346.815	181.44	151.61	197.59	391.602	258.04	256.76
ENSDARG00000030262	798392	si:ch211-220i18.4	protein_coding	ZFIN	si:ch211-220i18.4 [Source:ZFIN;Acc:ZDB-GENE-090312-151]	-0.96781	1.348	12.79	0.00034849	0.036906	71.6557	69.8551	67.4865	33.937	28.358	36.958	56.3755	37.148	36.963
ENSDARG00000075320	100141344	asmt	protein_coding	ZFIN	acetylserotonin O-methyltransferase [Source:ZFIN;Acc:ZDB-GENE-080220-43]	-0.98498	1.0494	15.114	0.00010121	0.015144	54.2402	52.8772	51.0843	25.369	21.199	27.628	52.8383	34.817	34.644
ENSDARG00000094946	571877	94946	protein_coding			-1.0068	0.929435	16.337	5.3024e-05	0.0094366	52.7873	51.4608	49.7159	24.315	20.319	26.481	43.362	28.573	28.431
ENSDARG00000090707	100333218	90707	protein_coding			-1.13766	1.26768	12.955	0.00031909	0.034773	72.3071	70.4901	68.1	30.43	25.428	33.139	48.7007	32.091	31.931
ENSDARG00000060792	NA	si:dkey-97i18.6	processed_transcript	ZFIN	si:dkey-97i18.6 [Source:ZFIN;Acc:ZDB-GENE-100922-209]	-1.24506	1.5859	12.407	0.0004277	0.044373	95.2805	92.8862	89.7368	37.232	31.112	40.547	51.2466	33.768	33.6
ENSDARG00000079227	100136845	plekhs1	protein_coding	ZFIN	pleckstrin homology domain containing, family S member 1 [Source:ZFIN;Acc:ZDB-GENE-080204-50]	-1.25784	2.08018	13.092	0.00029662	0.033539	134.917	131.526	127.067	52.283	43.689	56.938	100.32	66.105	65.775
ENSDARG00000091015	NA	si:ch211-231h20.2	processed_transcript	ZFIN	si:ch211-231h20.2 [Source:ZFIN;Acc:ZDB-GENE-090313-94]	-1.34469	1.00881	14.96	0.00010982	0.016112	62.5548	60.9829	58.9152	22.781	19.036	24.809	44.5915	29.383	29.237
ENSDARG00000093754	100192217	zgc:195195	protein_coding	ZFIN	zgc:195195 [Source:ZFIN;Acc:ZDB-GENE-081022-193]	-1.35276	0.778217	13.29	0.00026689	0.030756	48.7995	47.5732	45.9602	17.656	14.754	19.228	43.5997	28.73	28.587
ENSDARG00000018797	554128	crygmxl1	protein_coding	ZFIN	crystallin, gamma MX, like 1 [Source:ZFIN;Acc:ZDB-GENE-050522-392]	-1.38381	1.65884	13.615	0.00022434	0.027532	102.026	99.4624	96.09	36.206	30.255	39.43	69.0955	45.53	45.303
ENSDARG00000025608	791531	casp6l1	protein_coding	ZFIN	caspase 6, apoptosis-related cysteine peptidase, like 1 [Source:ZFIN;Acc:ZDB-GENE-041010-48]	-1.40544	0.882994	21.788	3.0448e-06	0.001029	53.1492	51.8136	50.0568	18.542	15.494	20.193	45.3969	29.914	29.765
ENSDARG00000058332	553479	58332	protein_coding			-1.42306	0.047009	16.051	6.1646e-05	0.010595	32.8887	32.0623	30.9751	11.304	9.4459	12.31	15.7899	10.405	10.353
ENSDARG00000004355	797815	nr0b2b	protein_coding	ZFIN	nuclear receptor subfamily 0, group B, member 2b [Source:ZFIN;Acc:ZDB-GENE-080403-9]	-1.65355	-0.765428	14.09	0.00017428	0.022692	21.2055	20.6726	19.9717	6.1703	5.1561	6.7197	3.4447	2.2699	2.2586
ENSDARG00000056502	796217	si:ch73-334d15.4	protein_coding	ZFIN	si:ch73-334d15.4 [Source:ZFIN;Acc:ZDB-GENE-091204-184]	-1.68789	0.643119	12.225	0.00047166	0.047926	42.9641	41.8844	40.4643	12.291	10.271	13.386	45.4247	29.932	29.783
ENSDARG00000070020	790957	cyp2aa9	protein_coding	ZFIN	cytochrome P450, family 2, subfamily AA, polypeptide 9 [Source:ZFIN;Acc:ZDB-GENE-080724-3]	-1.71989	0.154661	14.295	0.00015624	0.020794	31.8587	31.0582	30.0051	8.8888	7.4278	9.6803	27.7794	18.305	18.214
ENSDARG00000059412	553663	zgc:111976	protein_coding	ZFIN	zgc:111976 [Source:ZFIN;Acc:ZDB-GENE-050522-332]	-1.79444	-0.968528	14.303	0.00015565	0.020794	14.3946	14.0329	13.5571	3.7629	3.1444	4.098	9.0754	5.9802	5.9504
ENSDARG00000073820	565650	zgc:174917	protein_coding	ZFIN	zgc:174917 [Source:ZFIN;Acc:ZDB-GENE-070928-42]	-1.83274	0.769811	13.022	0.00030777	0.034285	73.1294	71.2917	68.8744	18.963	15.846	20.652	21.7992	14.364	14.293
ENSDARG00000096933	557207	si:ch211-135n15.2	protein_coding	ZFIN	si:ch211-135n15.2 [Source:ZFIN;Acc:ZDB-GENE-131121-526]	-2.00013	0.554854	20.296	6.6327e-06	0.001882	50.34	49.075	47.411	11.583	9.6794	12.615	27.2838	17.978	17.889
ENSDARG00000077959	NA	CU207281.2	protein_coding	Clone-based (Ensembl)	Uncharacterized protein [Source:UniProtKB/TrEMBL;Acc:F1QTM9]	-2.63325	-1.63644	14.125	0.00017106	0.02237	7.54093	7.35144	7.10218	1.0245	0.85608	1.1157	6.4728	4.2652	4.2439
ENSDARG00000094837	NA	si:dkey-228g21.5	processed_transcript	ZFIN	si:dkey-228g21.5 [Source:ZFIN;Acc:ZDB-GENE-090313-254]	-3.26187	-1.72584	16.428	5.0542e-05	0.0090896	8.22099	8.01441	7.74267	0.68457	0.57205	0.74553	4.4028	2.9012	2.8867
ENSDARG00000068006	751668	gck	protein_coding	ZFIN	glucokinase (hexokinase 4, maturity onset diabetes of the young 2) [Source:ZFIN;Acc:ZDB-GENE-060825-204]	-3.70692	2.01761	35.552	2.4829e-09	2.1964e-06	247.203	240.991	232.82	17.453	14.584	19.007	24.1454	15.91	15.831
ENSDARG00000088325	NA	CABZ01034082.1	protein_coding	Clone-based (Ensembl)	Uncharacterized protein [Source:UniProtKB/TrEMBL;Acc:H9GZC7]	-3.72908	-1.93242	17.608	2.714e-05	0.005553	6.51681	6.35305	6.13765	0.34189	0.28569	0.37233	3.887	2.5613	2.5486
ENSDARG00000074250	NA	74250	protein_coding			-4.51379	-1.75833	32.107	1.4588e-08	1.1859e-05	11.3226	11.038	10.6638	0.34187	0.28568	0.37232	0.4328	0.28519	0.28377
