# Supplementary material for: Transcriptome Analysis of Chemically-Induced Sensory Neuron Ablation in Zebrafish
Source: PLoS One. 2016 Feb 10;11(2):e0148726. doi: 10.1371/journal.pone.0148726 (PMC4749159; doi:10.1371/journal.pone.0148726)
Supplement: S8 Table — (XLSX) [file pone.0148726.s009.xlsx]

## Sheet: 5fb4ffcc-b5ff-43c4-8a6f-a847f6d
Category	ID	Name	Source	p-value	q-value Bonferroni	q-value FDR B&H	q-value FDR B&Y	Hit Count in Query List	Hit Count in Genome	Hit in Query List
GO: Molecular Function	GO:0031682	G-protein gamma-subunit binding		0.0003821	0.01834	0.01834	0.08178	1	1	GNB5
GO: Molecular Function	GO:0003872	6-phosphofructokinase activity		0.001146	0.05499	0.0229	0.1021	1	3	PFKP
GO: Molecular Function	GO:0036002	pre-mRNA binding		0.004575	0.2196	0.0343	0.1529	1	12	SRSF6
GO: Biological Process	GO:0006376	mRNA splice site selection		3.38e-05	0.008011	0.005746	0.03475	2	24	SRSF1,SRSF6
GO: Biological Process	GO:0071482	cellular response to light stimulus		0.0004124	0.09773	0.01163	0.07034	2	83	SAG,GNB5
Pathway	833793	The phototransduction cascade	BioSystems: REACTOME	9.403e-05	0.01147	0.002564	0.01381	2	33	SAG,GNB5
Pathway	105957	mRNA 3'-end processing	BioSystems: REACTOME	0.0001059	0.01292	0.002564	0.01381	2	35	SRSF1,SRSF6
