# Supplementary material for: Transcriptome Analysis of Chemically-Induced Sensory Neuron Ablation in Zebrafish
Source: PLoS One. 2016 Feb 10;11(2):e0148726. doi: 10.1371/journal.pone.0148726 (PMC4749159; doi:10.1371/journal.pone.0148726)
Supplement: S14 Table — (XLSX) [file pone.0148726.s015.xlsx]

## Sheet: 4cfe42ad-b08a-4dc2-b446-3b4dd2a
Category	ID	Name	Source	p-value	q-value Bonferroni	q-value FDR B&H	q-value FDR B&Y	Hit Count in Query List	Hit Count in Genome	Hit in Query List
GO: Molecular Function	GO:0016491	oxidoreductase activity		8.548e-06	0.003701	0.003701	0.02461	14	733	CYP3A5,COX4I1,CYP51A1,TP53I3,HSD11B1L,PTGS2,MSMO1,SC5D,DHFR,TM7SF2,DIO1,HAAO,ALDH2,CYB5R2
GO: Molecular Function	GO:0005506	iron ion binding		0.0001635	0.07078	0.03539	0.2353	6	171	CYP3A5,CYP51A1,MFI2,MSMO1,SC5D,HAAO
GO: Biological Process	GO:0016126	sterol biosynthetic process		1.454e-12	2.89e-09	2.89e-09	2.362e-08	9	49	CYP51A1,HMGCS1,MSMO1,SC5D,FDPS,EBP,TM7SF2,LSS,CYB5R2
GO: Biological Process	GO:0008610	lipid biosynthetic process		3.217e-09	6.396e-06	1.066e-06	8.712e-06	17	605	ANG,INPP5K,CYP51A1,HMGCS1,PTGS2,LIPC,PHOSPHO1,MSMO1,SC5D,FDPS,EBP,TM7SF2,ABCB11,C3,LSS,OXSM,CYB5R2
GO: Biological Process	GO:0009725	response to hormone		3.082e-06	0.006127	0.0003829	0.003129	16	871	ANG,MAT2A,FOS,INPP5K,GATM,RGS9,HMGCS1,NR4A1,PTGS2,RXRG,CFB,JUNB,BTG2,EGR1,STC2,SERPINA7
GO: Biological Process	GO:0006957	complement activation, alternative pathway		3.655e-05	0.07267	0.00346	0.02828	3	14	CFB,CFD,C3
GO: Biological Process	GO:0055114	oxidation-reduction process		0.0001224	0.2433	0.009011	0.07364	15	1052	CYP3A5,COX4I1,INPP5K,CYP51A1,TP53I3,HSD11B1L,PTGS2,MSMO1,SC5D,DHFR,TM7SF2,DIO1,HAAO,ALDH2,CYB5R2
Pathway	106142	Cholesterol biosynthesis	BioSystems: REACTOME	3.018e-13	2.508e-10	2.508e-10	1.831e-09	8	22	CYP51A1,HMGCS1,MSMO1,SC5D,FDPS,EBP,TM7SF2,LSS
Pathway	106410	Alternative complement activation	BioSystems: REACTOME	8.045e-07	0.0006686	5.143e-05	0.0003754	3	4	CFB,CFD,C3
Pathway	137941	Calcium signaling in the CD4+ TCR pathway	BioSystems: Pathway Interaction Database	0.0005949	0.4944	0.01412	0.1031	3	28	FOS,PTGS2,JUNB
